# Supplementary material for: Altered intestinal microbiota–host mitochondria crosstalk in new onset Crohn's disease
Source: PubMed Central journal article supplement (PMC5122959; doi:10.1038/ncomms13419), 2016-11-23
Supplement: ncomms13419-s1.pdf [file ncomms13419-s1.pdf]

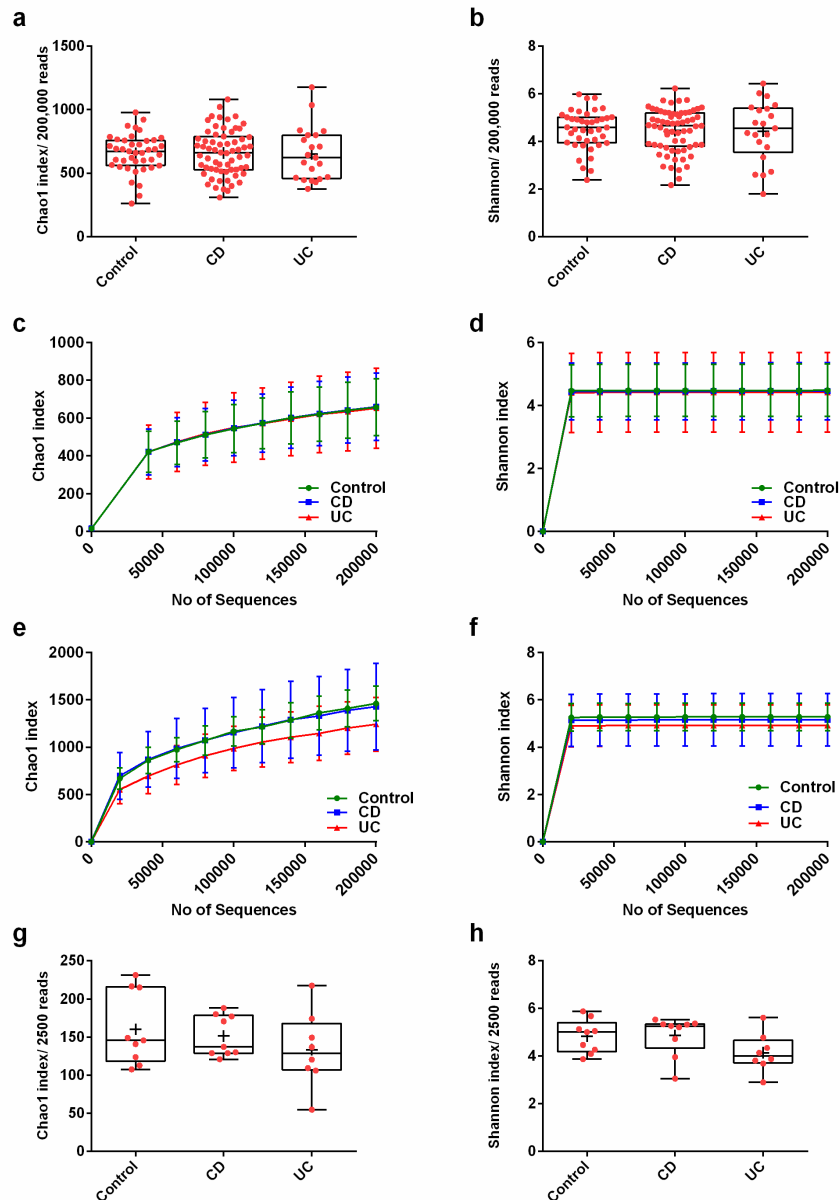

**Supplementary Figure 1: The gut microbiota exhibits similar diversity at the right colon of pediatric patients with IBD in comparison to control children.** Richness and diversity of the intestinal microbiota were estimated via Chao1 and Shannon indices as calculated by QIIME1.8. **a-b**, Diversity measures of right colon MLI microbiota in control subjects (n= 42) and patients with Crohn’s disease (CD; n= 65) and ulcerative colitis (UC; n=21). **c-d**, Diversity measures for the samples as in a-b at different rarefaction depths. **e-f**, Diversity measures of the microbiota from mucosal biopsies collected from control subjects (n=9), CD children (n=20) and UC patients (n=8). **g-h**, diversity measures of MLI microbiota per 2500 pyrosequencing reads in control (n=9), CD (n=9) and UC (n=8) subjects. Statistical comparisons were done by Kruskal-Wallis followed by Dunn’s multiple comparisons. All comparisons were non-significant.

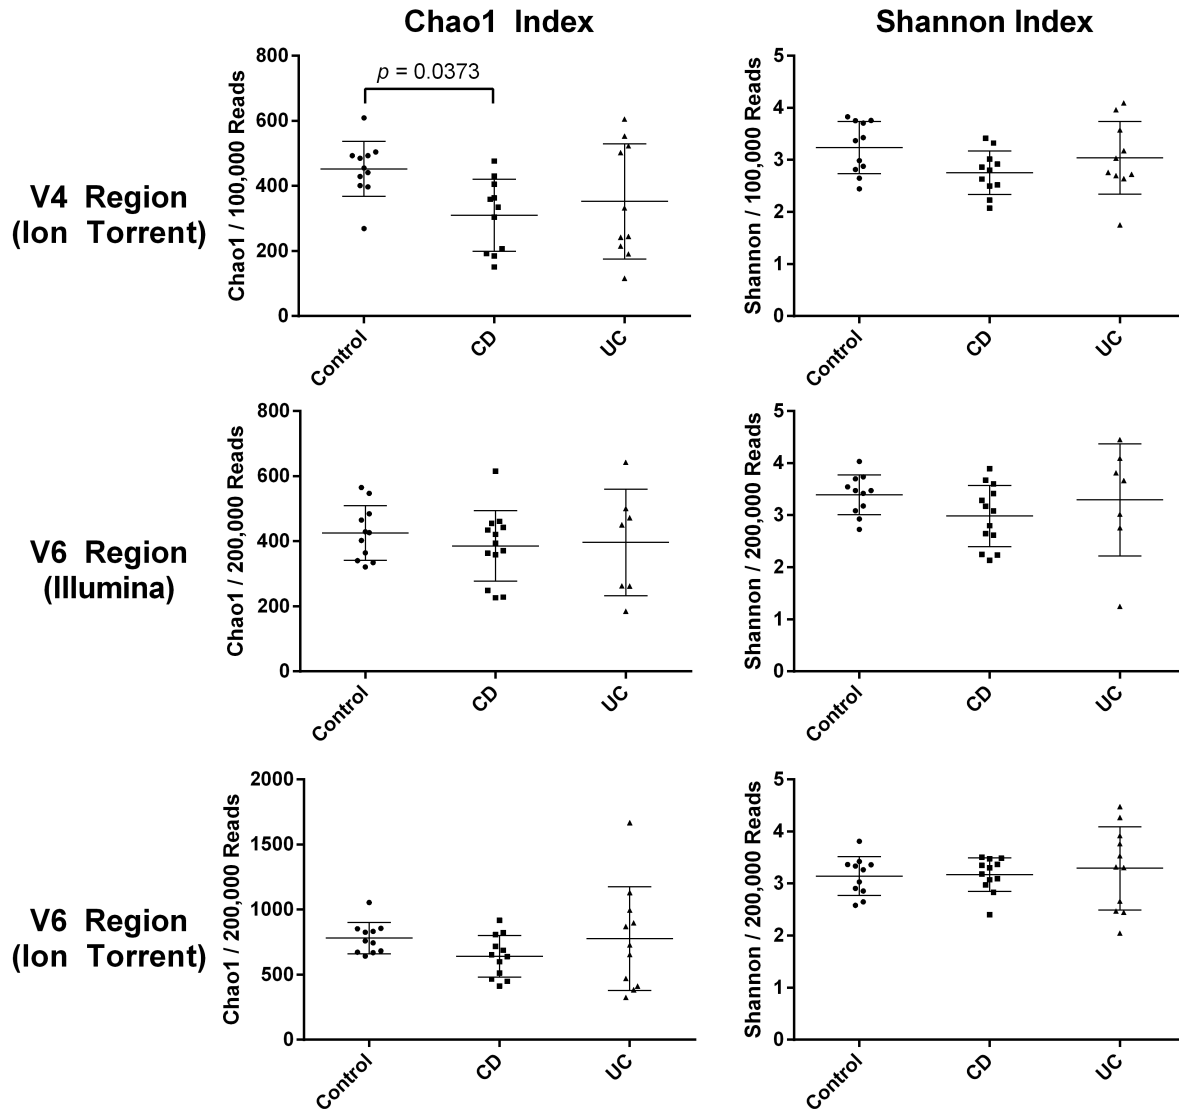

**Supplementary Figure 2: Chao1/Shannon indices as measured by V4/V6 sequencing using Illumina/Ion Torrent platforms** No differences were observed between control, CD and UC groups in the Shannon index under any sequencing target/platform. V4 sequencing suggests a lower Chao1 index between Control and CD patients, while no difference is seen between Controls and CD when targeting the V6 region. Statistical differences tested using a Kruskal-Wallis non-parametric test with a Dunn's post hoc test. All comparisons were non-significant unless indicated otherwise.

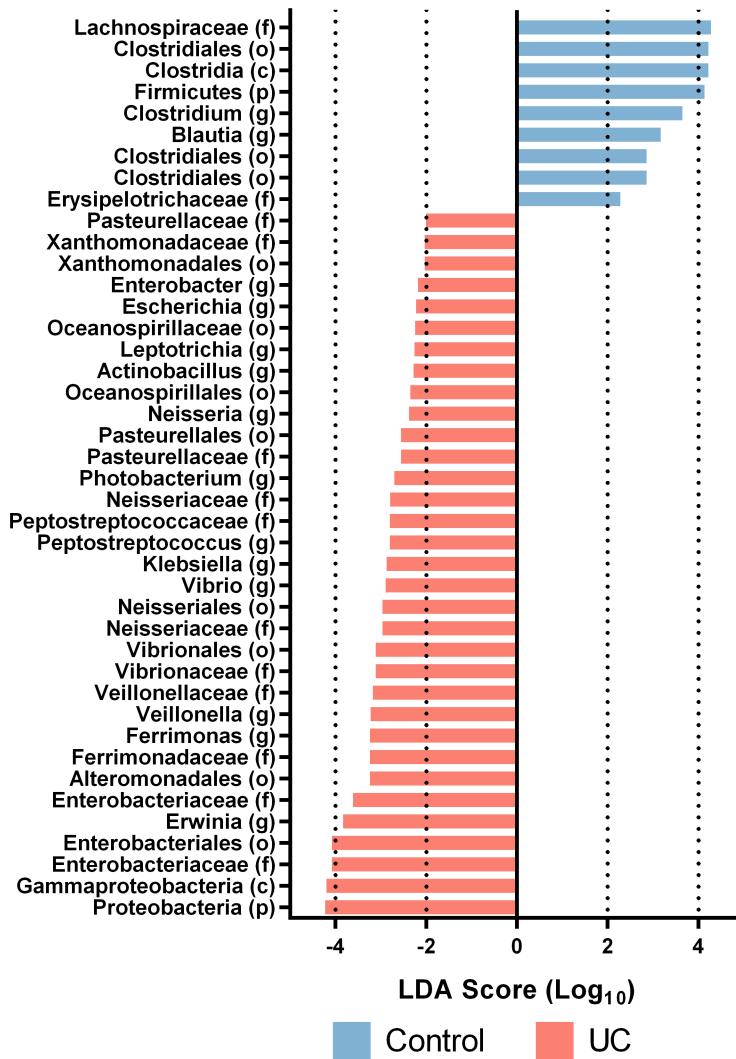

**Supplementary Figure 3:** Histogram of linear discriminant analysis (LDA) effect size score for UC differentially abundant taxa compared to controls (n=21 and 42 for UC and controls, respectively); only OTUs meeting an LDA significant threshold  $\geq 2$  with a  $p < 0.05$  are shown.

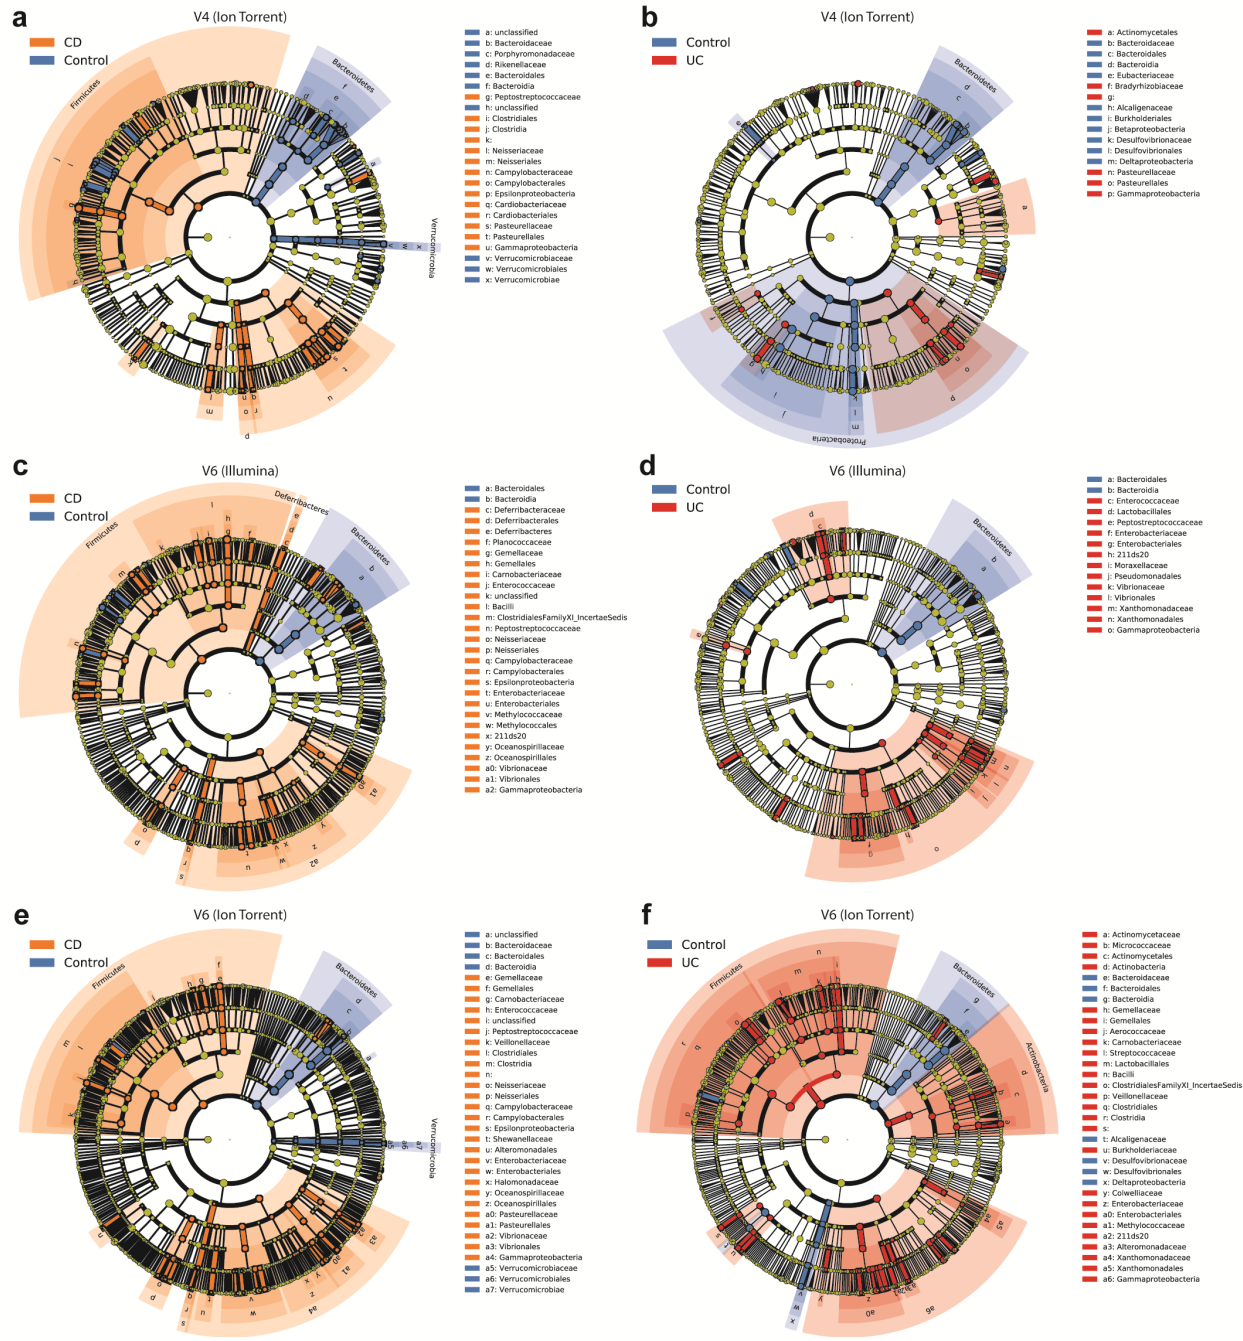

**Supplementary Figure 4: V4/V6 sequencing using either Illumina/Ion Torrent platforms identifies similar differentially abundant taxa.** Differentially abundant taxa were identified using LefSe between control/CD (a,c,e) and control/UC (b,d,f) using the results from V4 Ion torrent sequencing (a,b), V6 Illumina sequencing (c,d) and V6 Ion torrent sequencing (e,f). The identified differentially abundant taxa are highly concordant across all three 16S datasets for both CD and UC. See Supplementary Data 3 for more information.

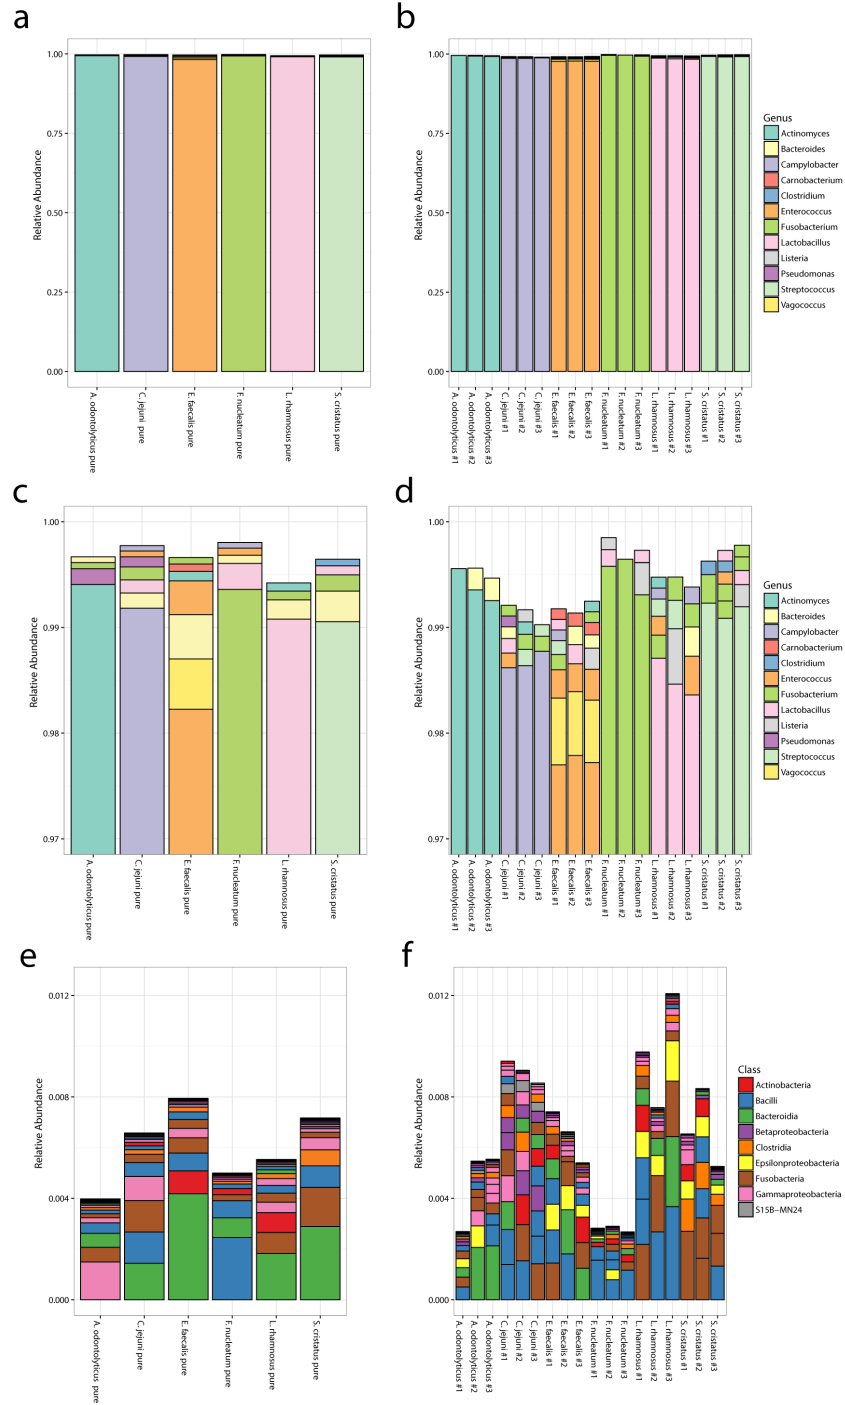

**Supplementary Figure 5: 16S-V6-rDNA profiling is robust to sequencing errors and contaminating OTUs:** 16S V6-rDNA results from six pure cultures of bacteria extracted directly (a, c, e) or re-extracted (b, d, f) through the FastDNA Spin kit. Relative abundance of the OTUs identified in both experiments are shown (a, b) along with a zoom-in of low abundant OTUs (c, d). Contaminate OTUs (present in >90% of each group) are also listed (e, f). For panels a-d, OTUs with a relative abundance <0.01% were excluded on a sample by sample basis for simplicity while panels e-f display all relevant OTUs regardless of relative abundance.

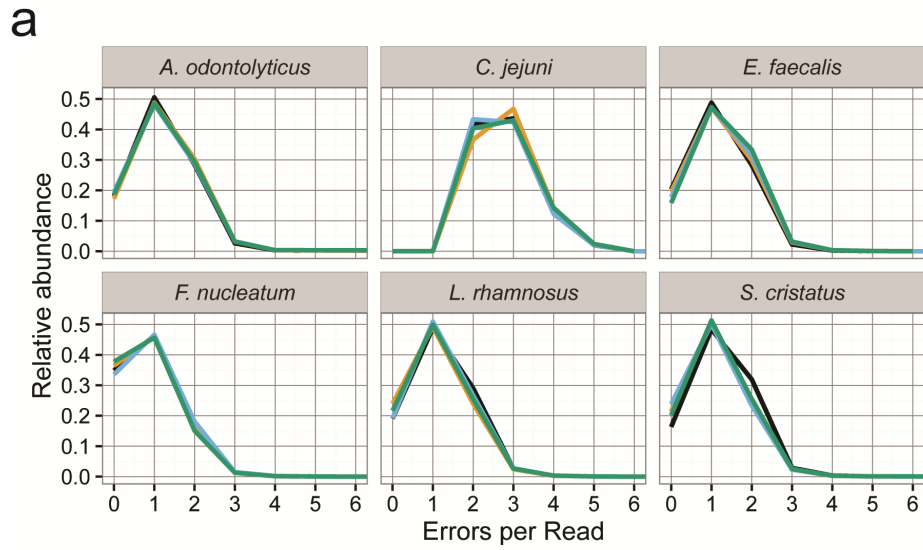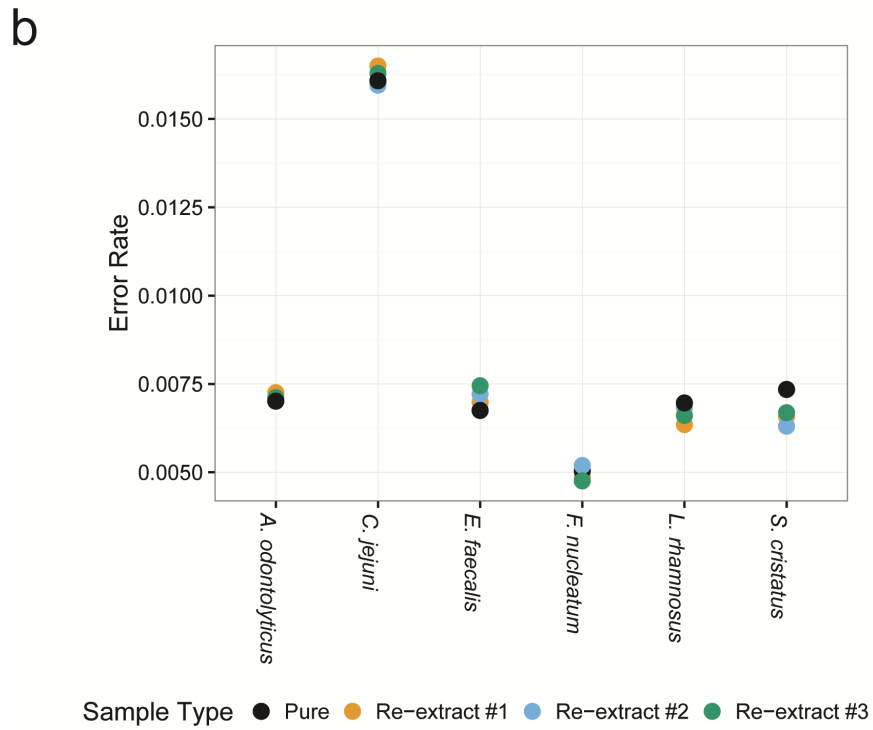

**Supplementary Figure 6: The 16S-V6-rDNA amplification protocol has a low error rate:** Analyzing the reads for each bacterial V6-16S library preparation revealed that most reads had  $\leq 2$  errors present (a). This corresponds to a median error rate of 0.007 (b). Note that *C. jejuni* reads have higher than average errors associated with them due to mismatches within the regions bound by the conserved primers used in the V6 amplification protocol (1 mismatch each in the forward and reverse primer).

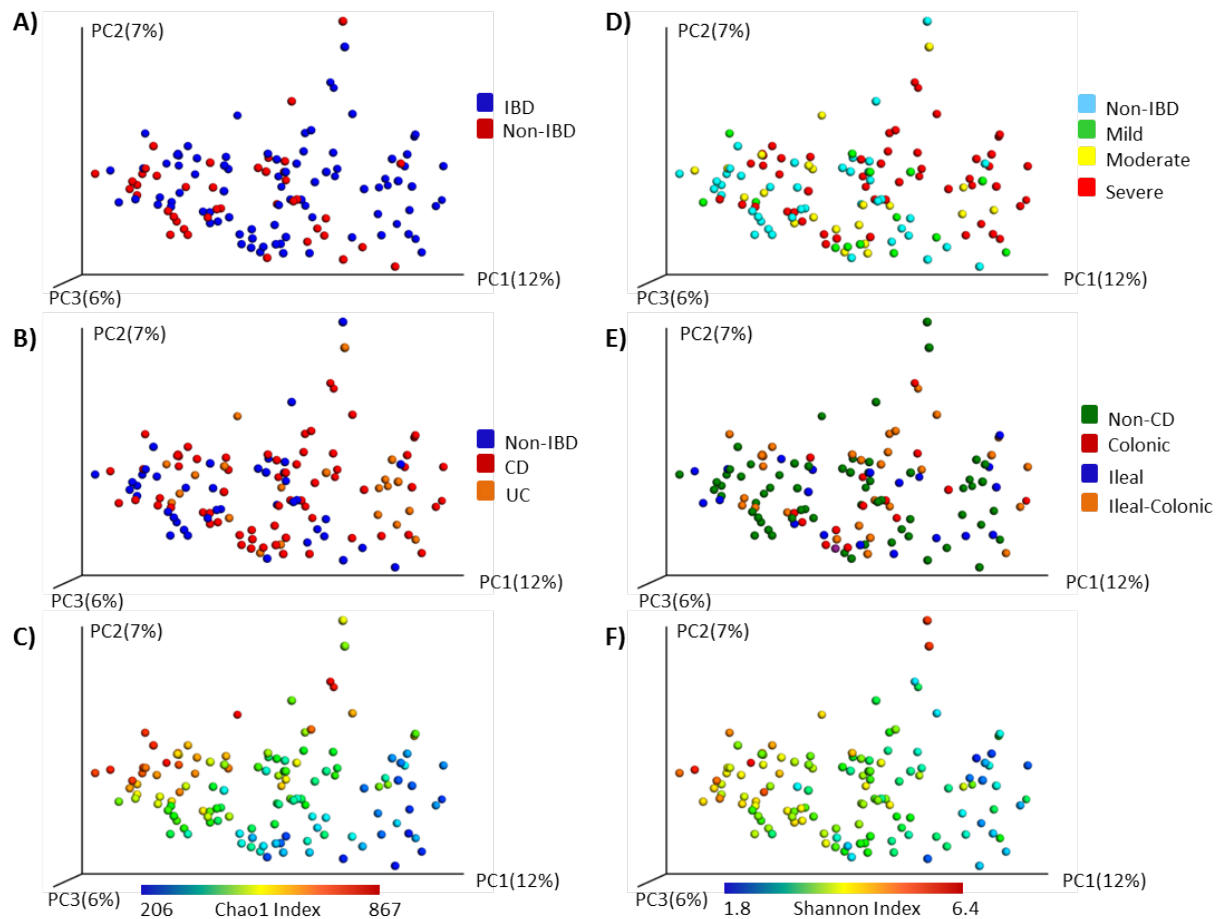

**Supplementary Figure 7: Principal Coordinate Analyses (PCoA) based on un-weighted UniFrac distances.** PCoA was conducted using QIIME 1.8 and 500,000 randomly selected reads per sample. The samples were colored either by disease status **a**, IBD phenotype **b**, Chao1 estimator **c**, inflammation severity **d**, CD involved location **e**, or Shannon entropy **f**. PC1, PC2 and PC3 represent the top three principal coordinates that captured the highest variability between samples and the percentage shown indicates the fraction of variation captured by each coordinate.

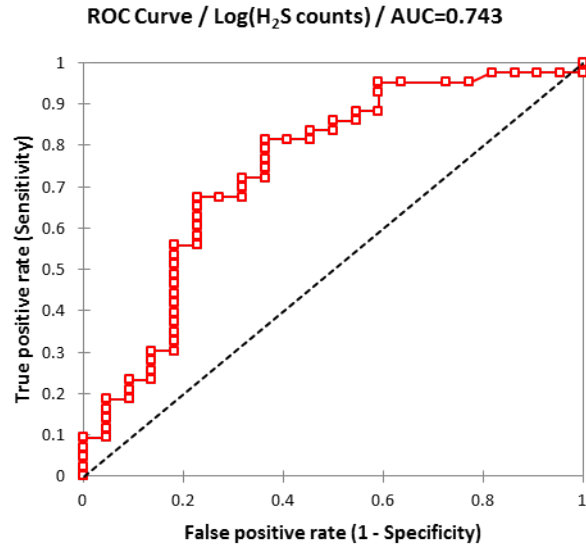

**Area under the curve (AUC):**

| AUC   | Standard error | Lower bound (95%) | Upper bound (95%) |
|-------|----------------|-------------------|-------------------|
| 0.743 | 0.067          | 0.611             | 0.874             |

**95% confidence interval on the difference between the AUC and 0.5 (Two-tailed test):**

|                      |          |
|----------------------|----------|
| Difference           | 0.243    |
| z (Observed value)   | 3.607    |
| z (Critical value)   | 1.960    |
| p-value (Two-tailed) | <0.00031 |
| alpha                | 0.05     |

**Supplementary Figure 8: Classification of CD patients with severe inflammation based on the relative abundance of H<sub>2</sub>S producers.** Receiver operating characteristic (ROC) curve for the classification of CD patients with severe inflammation and associated statistics based on the relative abundance of H<sub>2</sub>S producers.



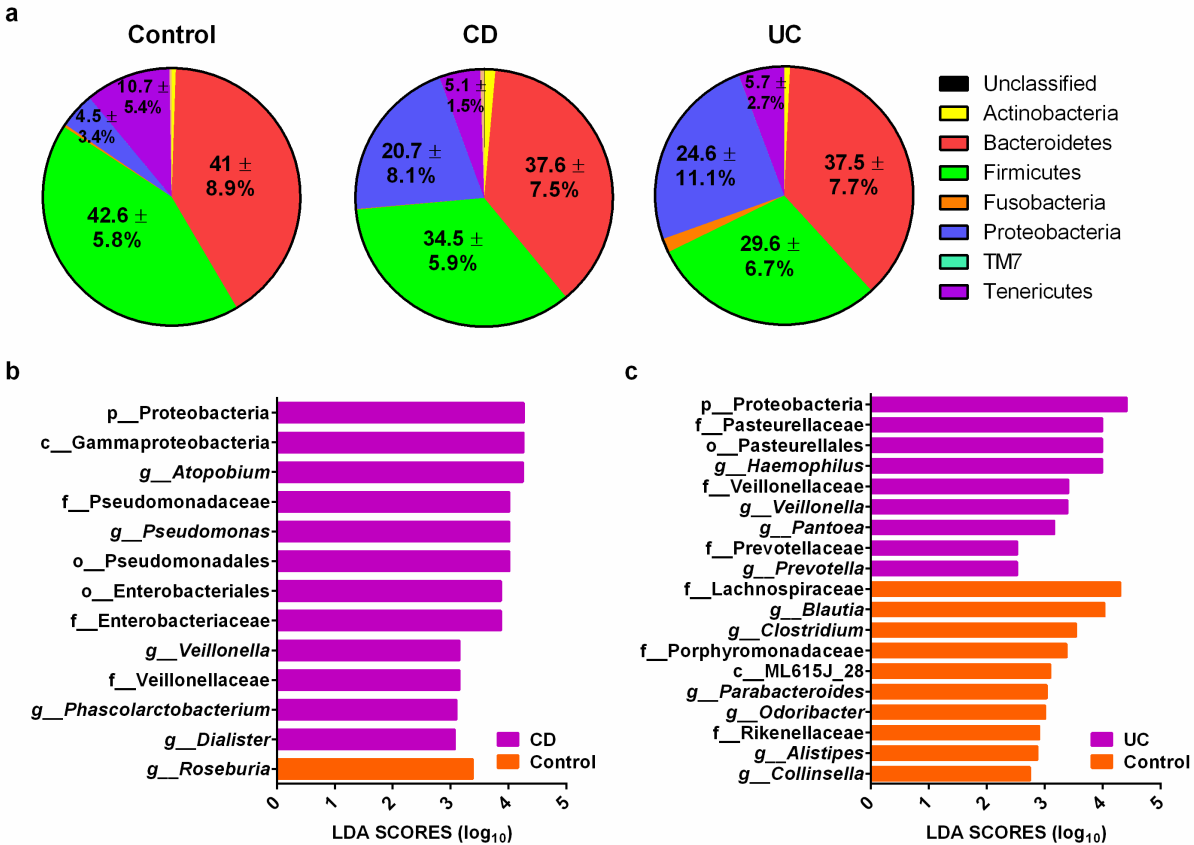

**Supplementary Figure 9: Taxonomic composition of the RC microbiota of IBD patients and control subjects based on 16S rRNA pyrosequencing reads.** Metagenomic DNA extracted from samples from non-IBD controls (n=9), Crohn's disease (CD; n=9) subjects and ulcerative colitis (UC; n=8) subjects were subjected to 454-pyrosequencing and the generated raw data were analyzed using QIIME 1.8. **a**, Average relative abundance  $\pm$  SEM of bacterial phyla identified in patients with CD, UC and control subjects. **b**, Histogram of the LDA effect size score for CD-specific differentially abundant taxa. **c**, Histogram of the LDA effect size score for UC-specific differentially abundant taxa.

**a**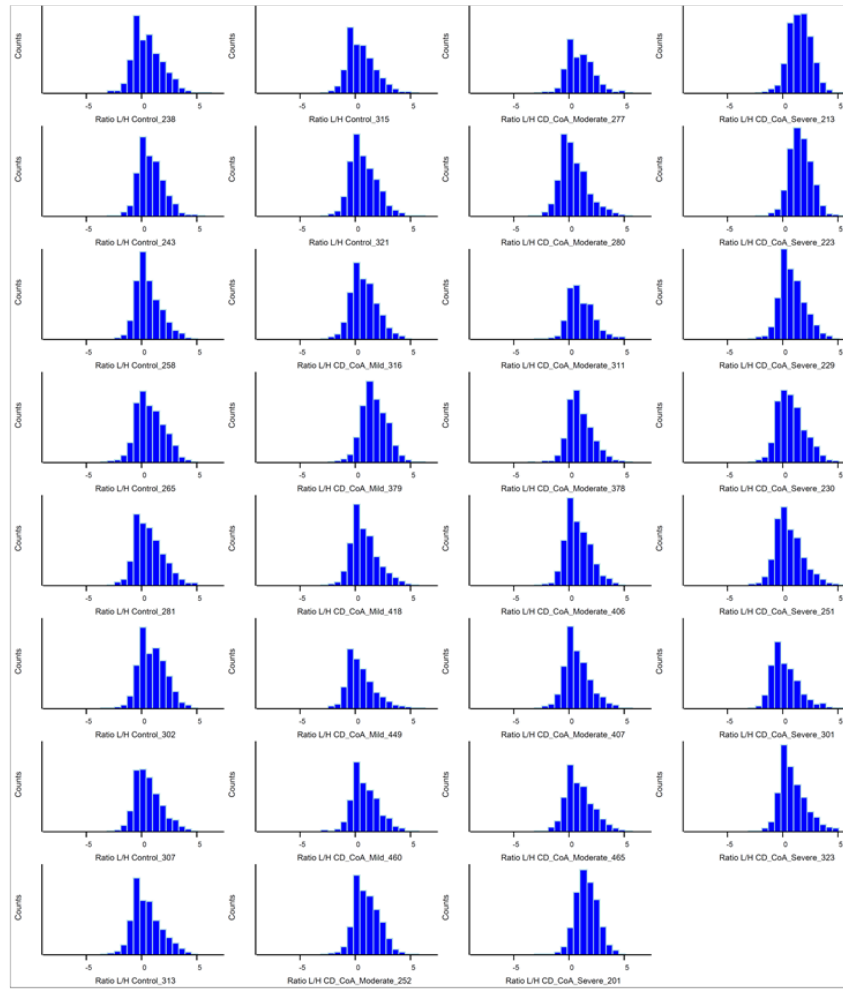**b**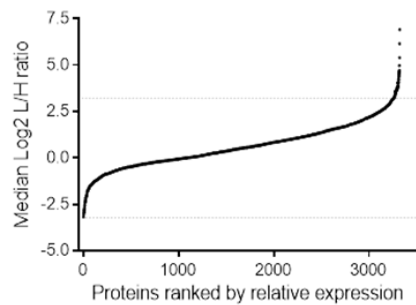**c**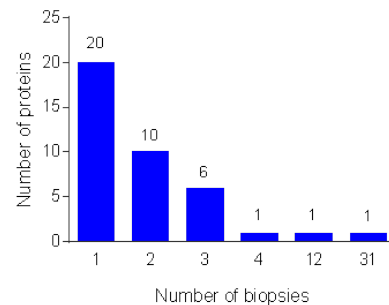

**Supplementary Figure 10: Evaluation of super-SILAC for quantitative analysis of colon biopsy proteomes.** (a) Histograms indicating the ratio distribution between the individual biopsy proteomes and the super-SILAC standard (non-normalized L/H ratios). (b) Median ratio distribution between individual biopsy proteins and the super-SILAC standard. The dotted lines indicate a 10-fold ratio between the median ratio of patient samples and the super-SILAC standard. (c) Plot of the number of proteins that were identified by light (biopsy) but without a heavy (super-SILAC) counterpart as compared with the number of biopsies from which that protein was identified in.

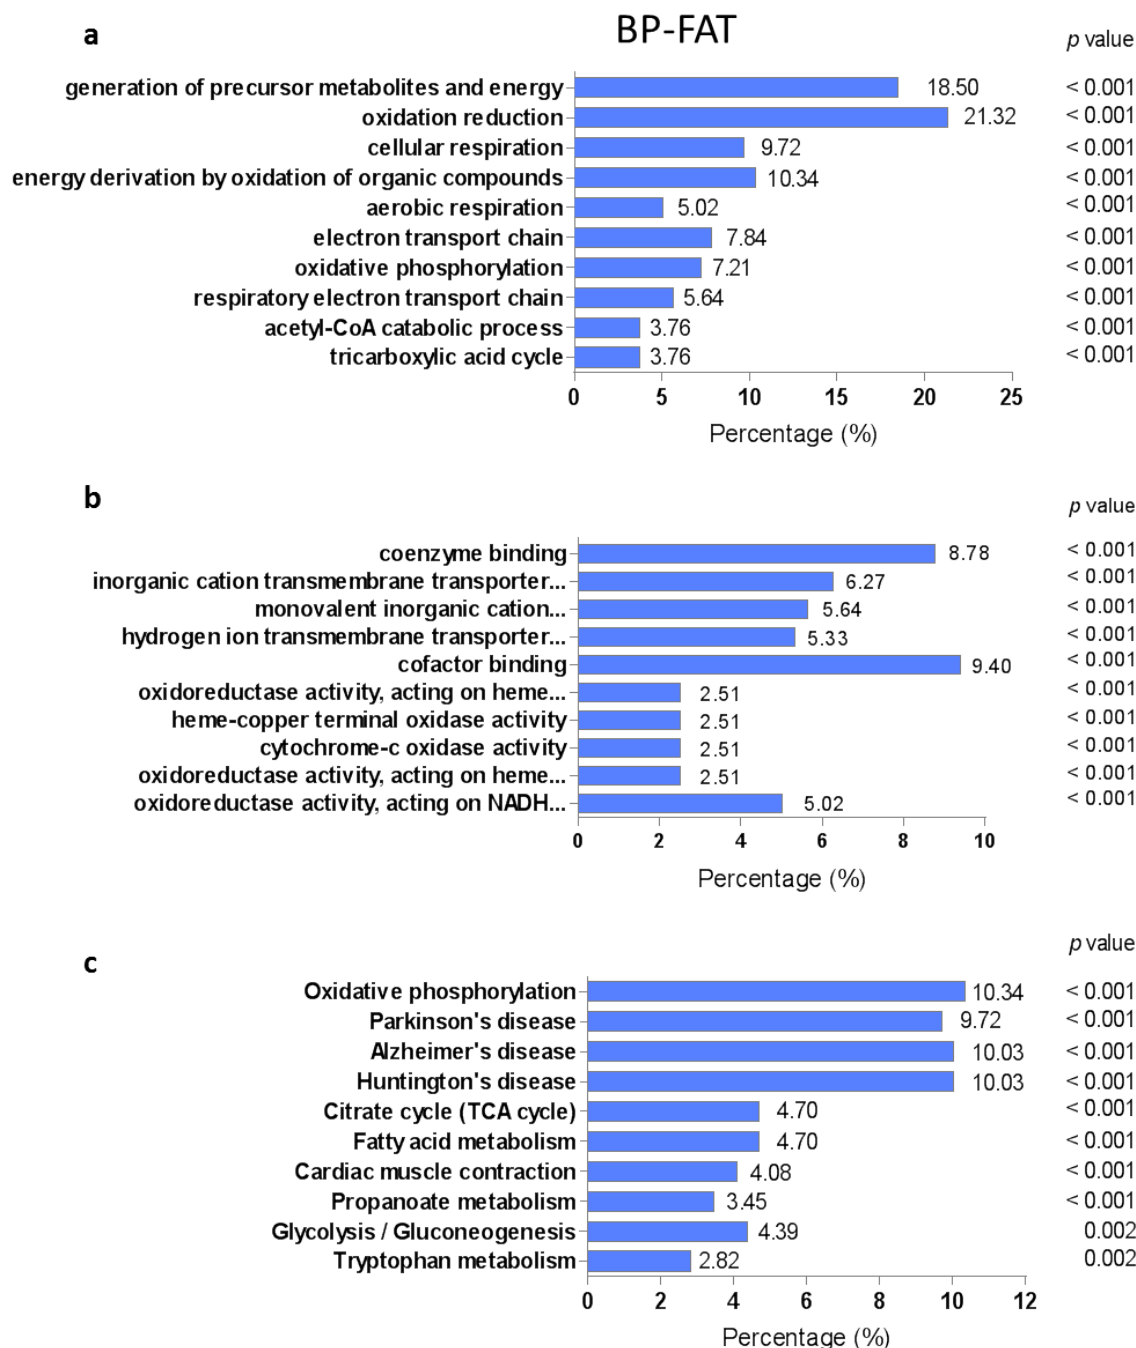

**Supplementary Figure 11: Top representative Gene Ontology (GO) and KEGG pathways enriched in CD patients as compared to control subjects.** Functional annotation tool (FAT) of the differentially expressed proteins; the 10 most significantly enriched functional groups (GO terms) are shown ( $p < 10^{-13}$ ); BP: biological processes (panel a); MF: molecular functions (panel b) and KEGG pathways (panel c). All classifications were significantly enriched compared to the entire proteomic dataset with  $p < 0.05$  (Fisher's exact test).

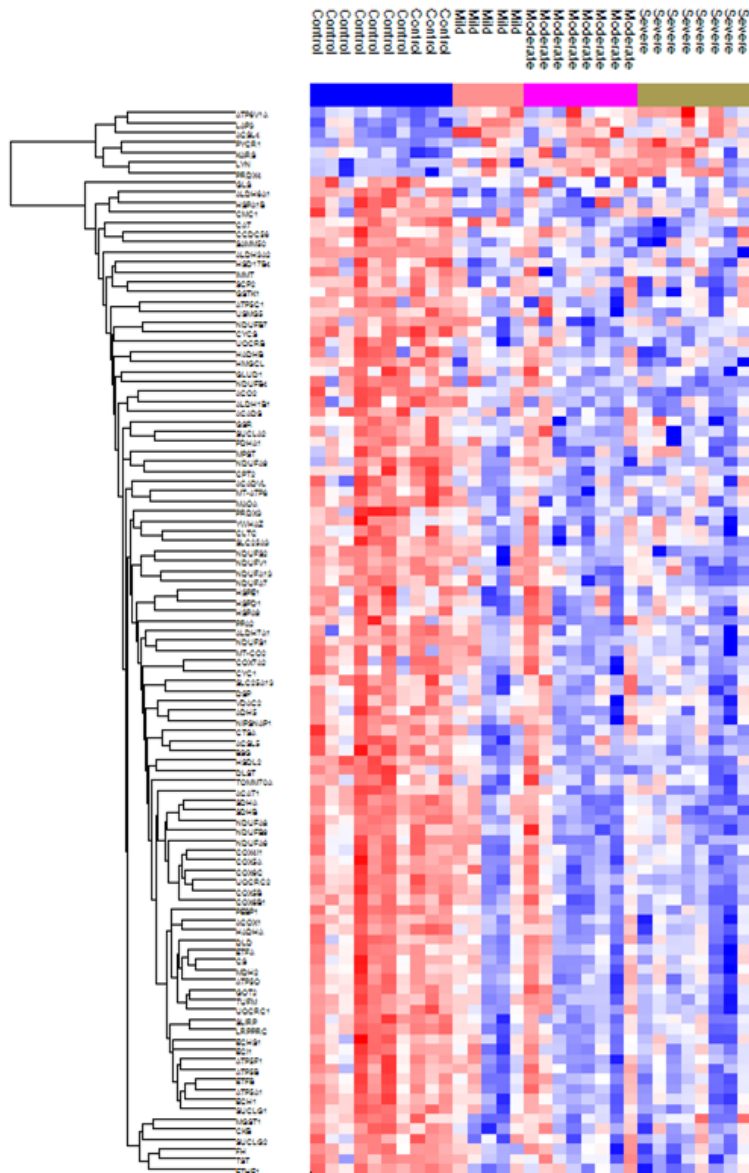

**Supplementary Figure 12: Hierarchical clustering of mitochondrial proteins found to be differentially expressed between control subjects and CD patients.** The heat map provides a graphical representation of row-normalized expression levels of individual mitochondrial proteins as a function of the disease status (control or CD with mild, moderate or severe inflammation). A color change from red to blue indicates a decrease in protein expression level.

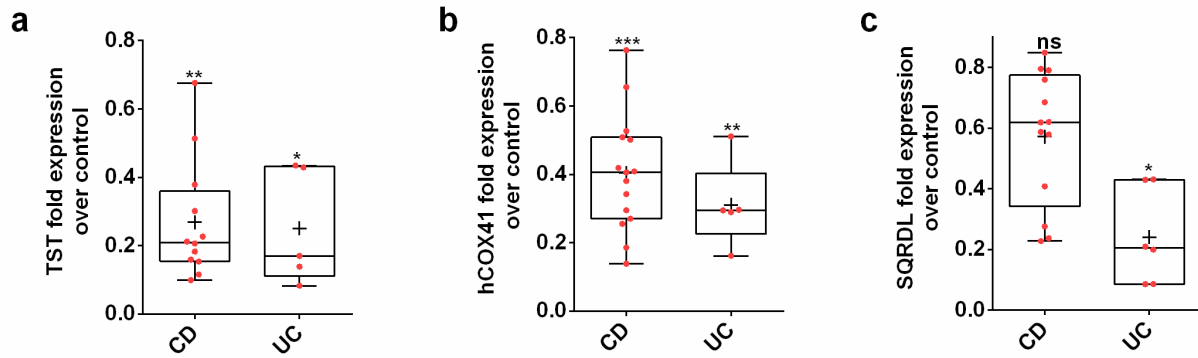

**Supplementary Figure 13: Expression level of mitochondrial sulfide detoxification pathway and cytochrome c oxidase is down regulated in IBD.** qRT-PCR of thiosulfate sulfur transferase (TST; **a**); cytochrome c oxidase subunit IV (hcox41; **b**); sulfide dehydrogenase (SQR; **c**); normalized to control; n=5 to 6 for UC, 11 to 13 for CD and 10 to 15 for controls. Statistical significance was assessed using a two-tailed Mann-Whitney test (ns; not significant, \* $p < 0.05$ , \*\* $p < 0.01$  and \*\*\* $p < 0.001$ ).

**a**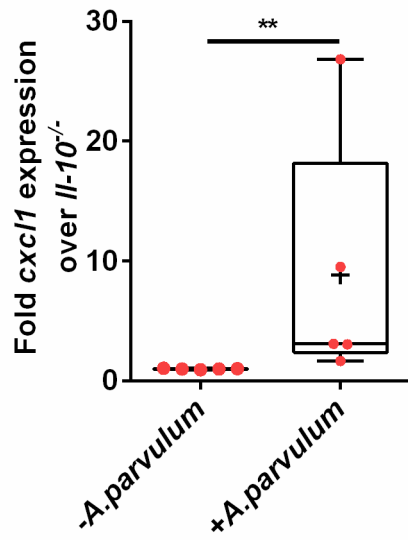**b**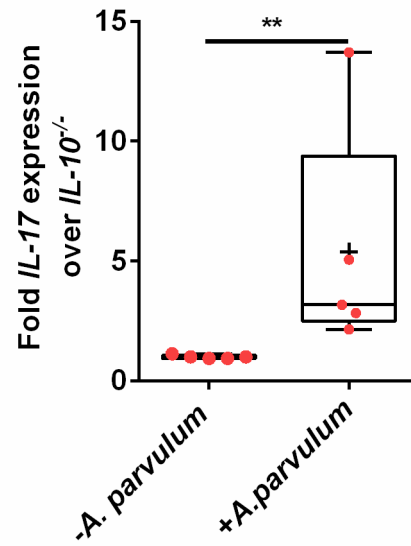

**Supplementary Figure 14: *A. parvulum* induces cytokine expression in conventionalized *Il10*<sup>-/-</sup> mice.** Germ-free *Il10*<sup>-/-</sup> mice were gavaged or not with *A. parvulum* and kept under SPF conditions (n=5 per group). Total RNA was extracted from colonic intestinal tissues 6 weeks post-gavage and *Cxcl1* and *Il-17* expression was measured by qRT-PCR, panels **a** and **b**. Data is expressed relative to the mean of the -*A. parvulum* control group. Crosses indicate mean (+) and the middle line indicates median. A Mann-Whitney U test was performed to assess statistical significance (\*\*  $p < 0.01$ ).

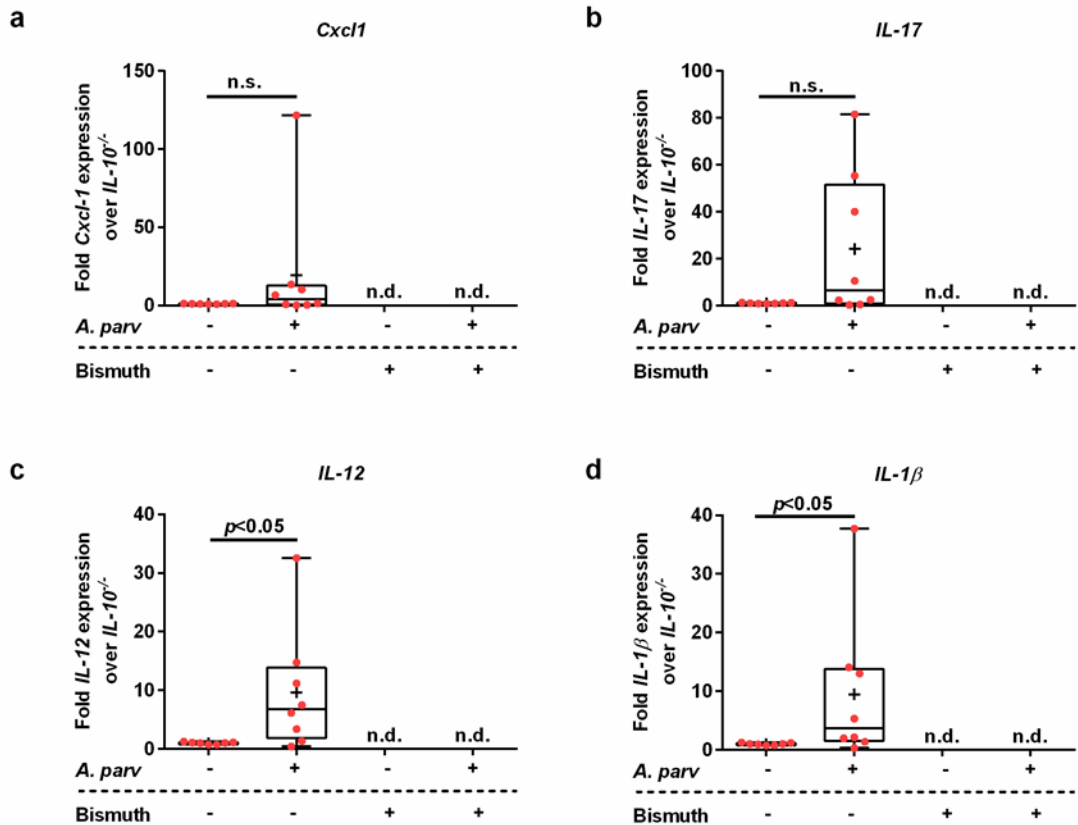

**Supplementary Figure 15: *A. parvulum* induces cytokine expression in conventionalized *IL-10*<sup>-/-</sup> mice.** C57Bl6, *IL-10*<sup>-/-</sup> mice were associated or not with *A. parvulum* and treated or not with bismuth and kept under SPF conditions (n=7-8 per group). Total RNA was extracted from colonic intestinal tissues 6 weeks post-association and *Cxcl1*, *IL-17*, *IL-12*, and *IL-1β* expressions (a-d) were measured by qRT-PCR. Crosses indicate mean and the middle line indicates median (n.d.; not detected). A Mann-Whitney U test was performed to assess statistical significance (n.s.; non-significant).

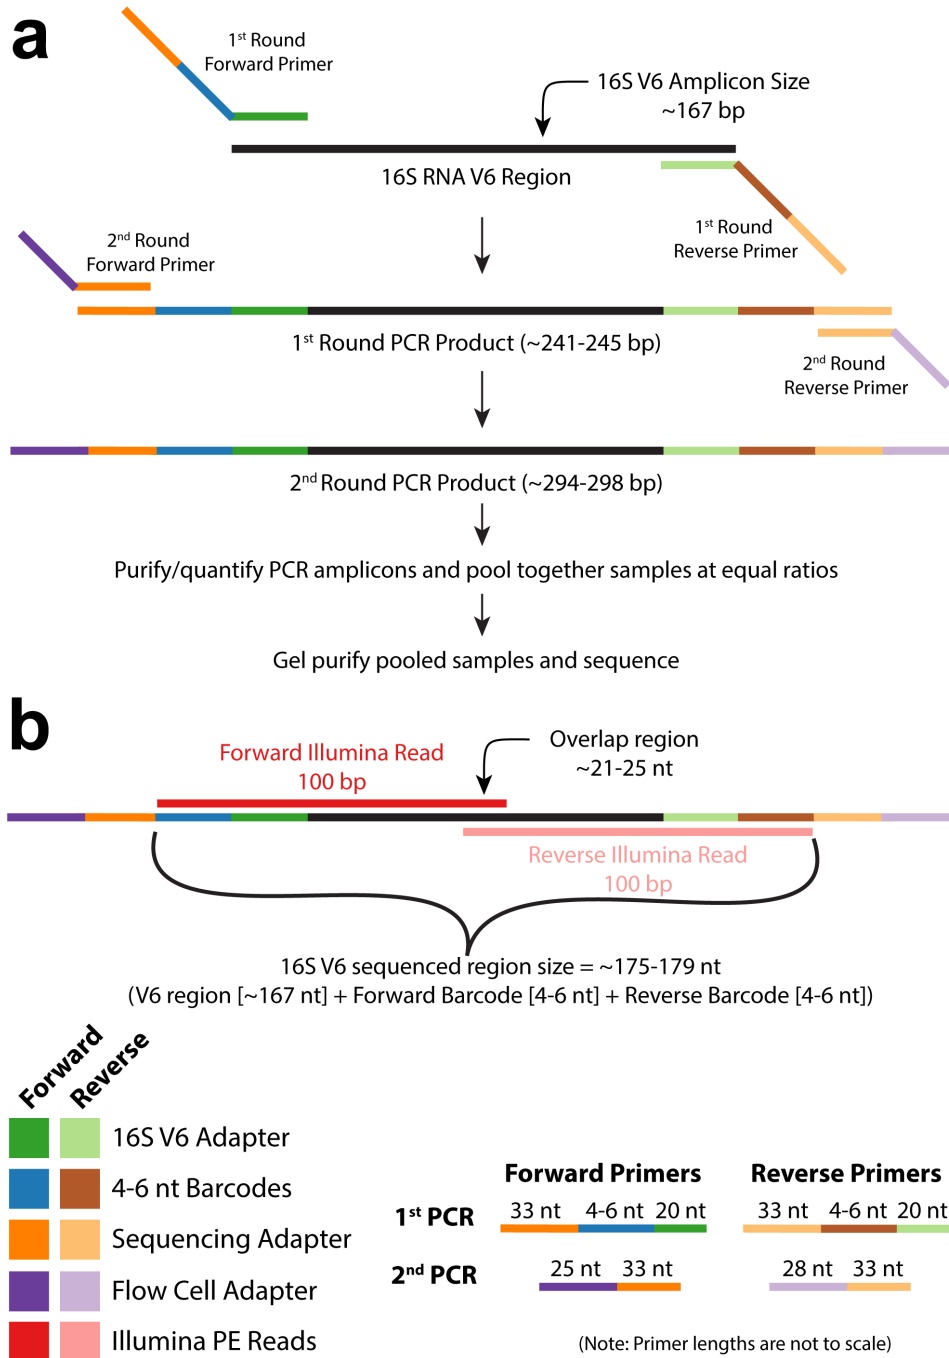

**Supplementary Figure 16: 16S rRNA –V6 library construction for Illumina sequencing. (A)**

Two successive PCR reactions are used to amplify the 16S V6 hypervariable region. The primers for the first PCR incorporate the barcode sequences and the sequencing adapters, while the primers for the second PCR adds the Illumina flow cell adapters. The amplicons are purified/quantified and equal quantities from each sample are pooled, gel extracted and sequenced. (B) Schematic detailing the regions that are sequenced during the 100 bp paired-end sequencing reaction.



**Supplementary Table 1: Characteristics of IBD patients and control subjects employed in the current study.**

| Sample ID | Gender | Age | Description | Disease | Disease Location    | Paris Classification | Visual Appearance | PCDAI /PUCAI   | Experiment                        |
|-----------|--------|-----|-------------|---------|---------------------|----------------------|-------------------|----------------|-----------------------------------|
| HMC002CO  | F      | 16  | UC          | IBD     | UlcerativeProctitis | E1S0                 | Normal            | mild(20)       | Illumina                          |
| HMC003CO  | F      | 9   | Control     | Control | NA                  | NA                   | Normal            | NA             | Illumina                          |
| HMC004CO  | M      | 12  | Control     | Control | NA                  | NA                   | Normal            | NA             | 454Pyro                           |
| HMC005CO  | F      | 10  | Control     | Control | NA                  | NA                   | Normal            | NA             | Illumina                          |
| HMC006CO  | M      | 15  | Control     | Control | NA                  | NA                   | Normal            | NA             | Illumina                          |
| HMC012CO  | M      | 13  | CD          | IBD     | Ileal               | A1bL1B1G0            | Normal            | mild(7.5)      | Illumina                          |
| HMC013CO  | M      | 12  | UC          | IBD     | Pancolitis          | E4S1                 | Inflamed          | Severe(65)     | Illumina                          |
| HMC014CO  | F      | 14  | CD          | IBD     | Ileal_Colonic       | A1bL3L4aB1G1         | Normal            | Moderate(37.5) | Illumina/454pyro/qPCR             |
| HMC015CO  | F      | 14  | CD          | IBD     | Ileal               | A1bL1B2G0            | Normal            | mild(10)       | Illumina                          |
| HMC016CO  | M      | 13  | CD          | IBD     | Ileal_Colonic       | A1bL3B1G0            | Normal            | mild(20)       | Illumina/qPCR                     |
| HMC017CO  | M      | 13  | CD          | IBD     | Colonic             | A1bL2L4aB1G1         | Inflamed          | Severe(57.5)   | Illumina/qPCR                     |
| HMC018CO  | M      | 13  | Control     | Control | NA                  | NA                   | Normal            | NA             | Illumina/qPCR                     |
| HMC019CO  | M      | 14  | UC          | IBD     | Pancolitis          | E4S1                 | Inflamed          | Severe(80)     | Illumina/454pyro                  |
| HMC020CO  | F      | 12  | Control     | Control | NA                  | NA                   | Normal            | NA             | 454Pyro                           |
| HMC022CO  | M      | 14  | CD          | IBD     | Ileal               | A1bL1B1G1            | Normal            | Moderate(37.5) | Illumina/qPCR                     |
| HMC023CO  | M      | 14  | UC          | IBD     | ExtensiveUC         | E3S1                 | Normal            | Moderate(50)   | Illumina/454pyro                  |
| HMC024CO  | M      | 16  | UC          | IBD     | ExtensiveUC         | E3S1                 | Normal            | Moderate(40)   | Illumina/454pyro/Ion Torrent      |
| HMC025CO  | F      | 15  | CD          | IBD     | Upper_GIT           | A1bL4bB1G0           | Normal            | mild(20)       | Illumina                          |
| HMC026CO  | F      | 16  | Control     | Control | NA                  | NA                   | Normal            | NA             | 454Pyro                           |
| HMC027CO  | F      | 16  | Control     | Control | NA                  | NA                   | Normal            | NA             | Illumina                          |
| HMC028CO  | M      | 13  | Control     | Control | NA                  | NA                   | Normal            | NA             | Illumina/454pyro/qPCR/Ion Torrent |
| HMC029CO  | M      | 14  | CD          | IBD     | Ileal_Colonic       | A1bL3L4aB1G0         | Inflamed          | Moderate(35)   | Illumina/qPCR                     |
| HMC030CO  | F      | 17  | CD          | IBD     | Ileal_Colonic       | A1bL4aL3B1G0         | Inflamed          | Severe(45)     | Illumina                          |
| HMC038CO  | F      | 16  | CD          | IBD     | Colonic             | A1bL2B1pG0           | Inflamed          | mild(20)       | Illumina/qPCR                     |
| HMC039CO  | F      | 13  | CD          | IBD     | Ileal               | A1bL1L4aB1G1         | Normal            | Severe(60)     | Illumina/qPCR                     |
| HMC041CO  | F      | 15  | CD          | IBD     | Ileal_Colonic       | A1bL3B1G0            | Normal            | Severe(62.5)   | Illumina/qPCR                     |
| HMC042CO  | M      | 17  | Control     | Control | NA                  | NA                   | Normal            | NA             | Illumina                          |
| HMC043CO  | F      | 16  | Control     | Control | NA                  | NA                   | Normal            | NA             | Illumina/qPCR                     |
| HMC044CO  | F      | 15  | CD          | IBD     | Ileal               | A1bL1B3G1            | Normal            | Severe(52.5)   | Illumina                          |

| Sample ID | Gender | Age | Description | Disease | Disease Location | Paris Classification | Visual Appearance | PCDAI /PUCAI   | Experiment            |
|-----------|--------|-----|-------------|---------|------------------|----------------------|-------------------|----------------|-----------------------|
| HMC045CO  | M      | 17  | UC          | IBD     | Pancolitis       | E4S0                 | Inflammed         | Moderate(45)   | Illumina/qPCR         |
| HMC046CO  | F      | 4   | UC          | IBD     | Pancolitis       | E4S1                 | Inflammed         | Severe(65)     | Illumina/454pyro      |
| HMC047CO  | M      | 16  | CD          | IBD     | Ileal_Colonic    | A1bL3L4aB1G1         | Inflammed         | Severe(65)     | Illumina/qPCR         |
| HMC049CO  | M      | 12  | CD          | IBD     | Ileal            | A1bL1B1G1            | Normal            | Severe(40)     | Illumina/454pyro/qPCR |
| HMC050CO  | F      | 16  | CD          | IBD     | Ileal            | A1bL1B1G0            | Normal            | mild(12.5)     | Illumina              |
| HMC051CO  | F      | 16  | CD          | IBD     | Ileal_Colonic    | A1bL3L4aB1G0         | Inflammed         | Severe(65)     | Illumina/qPCR         |
| HMC052CO  | F      | 8   | Control     | Control | NA               | NA                   | Normal            | NA             | 454Pyro               |
| HMC055CO  | M      | 6   | Control     | Control | NA               | NA                   | Normal            | NA             | Illumina/454pyro/qPCR |
| HMC056CO  | F      | 8   | Control     | Control | NA               | NA                   | Normal            | NA             | Illumina              |
| HMC059CO  | M      | 14  | Control     | Control | NA               | NA                   | Normal            | NA             | Illumina              |
| HMC061CO  | M      | 9   | CD          | IBD     | Colonic          | A1aL2B1G0            | Inflammed         | Moderate(32.5) | Illumina/454pyro/qPCR |
| HMC062CO  | F      | 15  | CD          | IBD     | Ileal_Colonic    | A1bL3L4aB3G0         | Inflammed         | Severe(57.5)   | Illumina/qPCR         |
| HMC063CO  | M      | 13  | CD          | IBD     | Ileal            | A1bL1L4aB1G1         | Normal            | Severe(65)     | Illumina/454pyro/qPCR |
| HMC064CO  | M      | 18  | UC          | IBD     | Pancolitis       | E4S1                 | Inflammed         | mild(0)        | Illumina/Ion Torrent  |
| HMC065CO  | M      | 16  | CD          | IBD     | Ileal            | A1bL1B2B3G0          | Normal            | Severe(50)     | Illumina              |
| HMC066CO  | F      | 18  | UC          | IBD     | Pancolitis       | E4S0                 | Inflammed         | Moderate(35)   | Illumina/454pyro      |
| HMC068CO  | M      | 17  | CD          | IBD     | Colonic          | A1bL2B1G0            | Inflammed         | Moderate(32.5) | 454Pyro               |
| HMC069CO  | F      | 17  | Control     | Control | NA               | NA                   | Normal            | NA             | Illumina              |
| HMC070CO  | F      | 8   | Control     | Control | NA               | NA                   | Normal            | NA             | 454Pyro               |
| HMC071CO  | M      | 11  | Control     | Control | NA               | NA                   | Normal            | NA             | Illumina              |
| HMC072CO  | M      | 12  | CD          | IBD     | Ileal_Colonic    | A1bL3L4aB1G1         | Inflammed         | Severe(55)     | Illumina/qPCR         |
| HMC073CO  | F      | 16  | Control     | Control | NA               | NA                   | Normal            | NA             | Illumina              |
| HMC074CO  | F      | 16  | Control     | Control | NA               | NA                   | Normal            | NA             | 454Pyro               |
| HMC075CO  | M      | 14  | CD          | IBD     | Colonic          | A1bL2B1G1            | Inflammed         | Severe(55)     | Illumina              |
| HMC076CO  | F      | 17  | UC          | IBD     | Pancolitis       | E4S0                 | Inflammed         | Moderate(55)   | 454pyro               |
| HMC077CO  | M      | 17  | UC          | IBD     | ExtensiveUC      | E3S0                 | Normal            | Moderate(50)   | Illumina/454pyro      |
| HMC078CO  | F      | 15  | CD          | IBD     | Ileal            | A1bL1B1G0            | Normal            | Severe(45)     | Illumina/qPCR         |
| HMC079CO  | M      | 16  | CD          | IBD     | Ileal_Colonic    | A1bL3B1pG0           | Inflammed         | Severe(50)     | Illumina/qPCR         |
| HMC081CO  | M      | 11  | CD          | IBD     | Ileal_Colonic    | A1bL3L4aB1G1         | Normal            | Severe(67.5)   | Illumina              |
| HMC082CO  | F      | 15  | CD          | IBD     | Ileal_Colonic    | A1aL3B1G0            | Inflammed         | mild(27.5)     | Illumina              |
| HMC084CO  | M      | 16  | CD          | IBD     | Colonic          | A1bL2B1G0            | Inflammed         | Severe(42.5)   | Illumina              |

| Sample ID | Gender | Age | Description | Disease | Disease Location    | Paris Classification | Visual Appearance | PCDAI /PUCAI   | Experiment                                                  |
|-----------|--------|-----|-------------|---------|---------------------|----------------------|-------------------|----------------|-------------------------------------------------------------|
| HMC085CO  | M      | 16  | CD          | IBD     | Colonic             | A1bL2B1pG1           | Normal            | Severe(67.5)   | Illumina/454pyro/qPCR                                       |
| HMC087CO  | F      | 18  | Control     | Control | NA                  | NA                   | Normal            | NA             | Illumina/454pyro/qPCR/Ion Torrent                           |
| HMC088CO  | M      | 16  | UC          | IBD     | UlcerativeProctitis | E1S0                 | Normal            | mild(20)       | Illumina                                                    |
| HMC090CO  | M      | 16  | CD          | IBD     | Ileal_Colonic       | A1bL3L4aB1G0         | Inflamed          | Severe(52.5)   | Illumina/454pyro/qPCR                                       |
| HMC091CO  | M      | 12  | Control     | Control | NA                  | NA                   | Normal            | NA             | Illumina                                                    |
| HMC092CO  | M      | 12  | UC          | IBD     | ExtensiveUC         | E3S1                 | Normal            | Severe(75)     | 454pyro                                                     |
| HMC093CO  | M      | 12  | CD          | IBD     | Ileal               | A1bL1B1pG0           | Normal            | mild(27.5)     | Illumina/454pyro                                            |
| HMC095CO  | M      | 11  | CD          | IBD     | Ileal_Colonic       | A1bL3B1pG1           | Normal            | Severe(65)     | Illumina                                                    |
| HMC097CO  | M      | 12  | CD          | IBD     | Ileal_Colonic       | A1bL3L4aB1G0         | Inflamed          | Severe(40)     | 454Pyro                                                     |
| HMC098CO  | F      | 16  | Control     | Control | NA                  | NA                   | Normal            | NA             | Illumina/qPCR                                               |
| HMC102CO  | F      | 17  | Control     | Control | NA                  | NA                   | Normal            | NA             | Illumina/Ion Torrent                                        |
| HMC106CO  | F      | 16  | Control     | Control | NA                  | NA                   | Normal            | NA             | qRTPCR/qPCR                                                 |
| HMC109CO  | F      | 3   | Control     | Control | NA                  | NA                   | Normal            | NA             | qRTPCR/qPCR                                                 |
| HMC110CO  | F      | 4   | Control     | Control | NA                  | NA                   | Normal            | NA             | qPCR                                                        |
| HMC112CO  | M      | 9   | Control     | Control | NA                  | NA                   | Normal            | NA             | qRTPCR/qPCR                                                 |
| HMC113DC  | M      | 15  | UC          | IBD     | Pancolitis          | E4S1                 | Inflamed          | Inactive(0)    | qRTPCR                                                      |
| HMC117CO  | F      | 15  | Control     | Control | NA                  | NA                   | Normal            | NA             | qRTPCR/qPCR<br>Illumina/Massspec/qRTPCR/qPCR/Ion<br>Torrent |
| HMC201CO  | F      | 11  | CD          | IBD     | Colonic             | A1bL2B1G1            | Inflamed          | Severe(47.5)   | Illumina/qRTPCR/Ion Torrent                                 |
| HMC202CO  | M      | 17  | CD          | IBD     | Ileal_Colonic       | A1bL3B1G0            | Inflamed          | Moderate(37.5) | Illumina/qRTPCR/Ion Torrent                                 |
| HMC203CO* | M      | 11  | CD          | IBD     | Ileal_Colonic       | A1bL3B1G0            | Inflamed          | Severe(55)     | Illumina/qRTPCR/qPCR/Ion Torrent                            |
| HMC204CO  | M      | 13  | CD          | IBD     | Ileal               | A1bL1L4bB1G1         | Normal            | Severe(50)     | Illumina/qRTPCR                                             |
| HMC205CO  | M      | 13  | CD          | IBD     | Ileal               | A1bL1L4aB1pG1        | Normal            | Severe(45)     | Illumina/qRTPCR/qPCR                                        |
| HMC206CO  | M      | 14  | CD          | IBD     | Ileal_Colonic       | A1bL3B1G1            | Inflamed          | Severe(47.5)   | Illumina/qPCR/qRTPCR                                        |
| HMC207CO  | F      | 13  | UC          | IBD     | Pancolitis          | E4S1                 | Inflamed          | Severe(70)     | Illumina/Ion Torrent                                        |
| HMC208CO  | F      | 16  | Control     | Control | NA                  | NA                   | Normal            | NA             | Illumina/qPCR/qRTPCR/Ion Torrent                            |
| HMC210CO  | F      | 17  | CD          | IBD     | Ileal               | A1bL1B1G0            | Normal            | Moderate(32.5) | qRTPCR                                                      |
| HMC211CO  | M      | 13  | Control     | Control | NA                  | NA                   | Normal            | NA             | qRTPCR                                                      |
| HMC212CO  | F      | 15  | Control     | Control | NA                  | NA                   | Normal            | NA             | qRTPCR/qPCR                                                 |
| HMC213CO  | M      | 10  | CD          | IBD     | Ileal_Colonic       | A1bL3B1G1            | Inflamed          | Severe(57.5)   | Illumina/MassSpec                                           |
| HMC214CO  | M      | 17  | UC          | IBD     | Pancolitis          | E4S0                 | Inflamed          | Moderate(40)   | qRTPCR                                                      |
| HMC215CO  | F      | 12  | UC          | IBD     | Pancolitis          | E4S1                 | Inflamed          | Severe(65)     | qRTPCR                                                      |

| Sample ID | Gender | Age | Description | Disease | Disease Location | Paris Classification | Visual Appearance | PCDAI /PUCAI   | Experiment                                                               |
|-----------|--------|-----|-------------|---------|------------------|----------------------|-------------------|----------------|--------------------------------------------------------------------------|
| HMC217CO  | F      | 14  | CD          | IBD     | Ileal            | A1bL1L4bB1G0         | Normal            | Severe(52.5)   | qRTPCR/qPCR                                                              |
| HMC219CO  | M      | 14  | CD          | IBD     | Ileal_Colonic    | A1bL3B1G1            | Inflamed          | Moderate(37.5) | qRTPCR/qPCR                                                              |
| HMC220CO  | M      | 13  | CD          | IBD     | Ileal_Colonic    | A1bL3B1G0            | Inflamed          | Severe(65)     | Illumina/qRTPCR/Ion Torrent                                              |
| HMC221CO  | F      | 9   | Control     | Control | NA               | NA                   | Normal            | NA             | Illumina/qPCR/qRTPCR                                                     |
| HMC222CO  | M      | 10  | Control     | Control | NA               | NA                   | Normal            | NA             | Illumina/qPCR/qRTPCR<br>Illumina/MassSpec/qRTPCR/qPCR/Ion<br>Torrent     |
| HMC223CO  | F      | 9   | CD          | IBD     | Colonic          | A1aL2B1G1            | Inflamed          | Severe(50)     | Illumina/qPCR/qRTPCR                                                     |
| HMC225CO  | F      | 15  | Control     | Control | NA               | NA                   | Normal            | NA             | Illumina/qPCR/qRTPCR                                                     |
| HMC228CO  | M      | 13  | CD          | IBD     | Ileal_Colonic    | A1bL3B1pG0           | Inflamed          | Severe(62.5)   | Illumina/qRTPCR/Ion Torrent                                              |
| HMC229CO  | M      | 10  | CD          | IBD     | Colonic          | A1bL2L4abB1G0        | Inflamed          | Severe(57.5)   | Illumina/qRTPCR/MassSpec/qPCR<br>Illumina/qRTPCR/MassSpec/Ion<br>Torrent |
| HMC230CO  | M      | 14  | CD          | IBD     | Ileal_Colonic    | A1bL3L4aB1pG0        | Inflamed          | Severe(52.5)   | Illumina/qPCR/qRTPCR                                                     |
| HMC231CO  | F      | 15  | CD          | IBD     | Ileal            | A1bL1B1G0            | Normal            | Moderate(37.5) | Illumina/qPCR/qRTPCR                                                     |
| HMC232CO  | F      | 15  | Control     | Control | NA               | NA                   | Normal            | NA             | Illumina/qPCR/qRTPCR/Ion Torrent                                         |
| HMC234CO  | F      | 13  | CD          | IBD     | Ileal_Colonic    | A1bL3B1G0            | Inflamed          | Severe(52.5)   | qRTPCR                                                                   |
| HMC235CO  | M      | 11  | CD          | IBD     | Ileal            | A1bL1B1G0            | Normal            | Moderate(32.5) | Illumina/qRTPCR                                                          |
| HMC237CO  | M      | 14  | Control     | Control | NA               | NA                   | Normal            | NA             | Illumina/qRTPCR/qPCR<br>Illumina/qPCR/qRTPCR/MassSpec/Ion<br>Torrent     |
| HMC238CO  | M      | 14  | Control     | Control | NA               | NA                   | Normal            | NA             | Illumina/qRTPCR                                                          |
| HMC240CO  | M      | 10  | CD          | IBD     | Ileal            | A1bL1B1G0            | Normal            | Severe(70)     | Illumina/qRTPCR                                                          |
| HMC241CO  | F      | 12  | Control     | Control | NA               | NA                   | Normal            | NA             | qRTPCR                                                                   |
| HMC242CO  | F      | 13  | UC          | IBD     | Pancolitis       | E4S1                 | Inflamed          | Severe(85)     | Illumina/Ion Torrent<br>Illumina/qRTPCR/MassSpec/Ion<br>Torrent          |
| HMC243CO  | M      | 8   | Control     | Control | NA               | NA                   | Normal            | NA             | Illumina/qRTPCR/Ion Torrent                                              |
| HMC244CO  | M      | 9   | UC          | IBD     | Pancolitis       | E4S1                 | Inflamed          | Severe(75)     | Illumina/qRTPCR/Ion Torrent                                              |
| HMC245CO  | M      | 16  | Control     | Control | NA               | NA                   | Normal            | NA             | Illumina/qRTPCR/qPCR/Ion Torrent                                         |
| HMC246CO  | M      | 13  | Control     | Control | NA               | NA                   | Normal            | NA             | Illumina/qRTPCR/qPCR/Ion Torrent                                         |
| HMC247CO  | F      | 13  | UC          | IBD     | Pancolitis       | E4S1                 | Inflamed          | Severe(80)     | Illumina/qRTPCR/Ion Torrent                                              |
| HMC249CO  | M      | 14  | UC          | IBD     | Pancolitis       | E4S0                 | Inflamed          | Moderate(45)   | Illumina/qRTPCR/Ion Torrent                                              |
| HMC251CO  | M      | 7   | CD          | IBD     | Ileal_Colonic    | A1aL3L4aB1G0         | Inflamed          | Severe(47.5)   | Illumina/MassSpec/Ion Torrent                                            |
| HMC252CO  | M      | 9   | CD          | IBD     | Ileal_Colonic    | A1aL3B1G0            | Inflamed          | Moderate(37.5) | MassSpec                                                                 |
| HMC253CO  | F      | 11  | CD          | IBD     | Colonic          | A1bL4aL2B1G0         | Inflamed          | Severe(40)     | Illumina/qPCR/Ion Torrent                                                |
| HMC255CO  | M      | 13  | Control     | Control | NA               | NA                   | Normal            | NA             | Illumina/qPCR/Ion Torrent                                                |
| HMC256CO  | F      | 10  | CD          | IBD     | Colonic          | A1bL2B1G0            | Normal            | Moderate(30)   | Illumina                                                                 |

| Sample ID | Gender | Age | Description | Disease | Disease Location | Paris Classification | Visual Appearance | PCDAI /PUCAI   | Experiment                         |
|-----------|--------|-----|-------------|---------|------------------|----------------------|-------------------|----------------|------------------------------------|
| HMC258CO  | M      | 15  | Control     | Control | NA               | NA                   | Normal            | NA             | Illumina/qPCR/MassSpec/Ion Torrent |
| HMC260CO  | M      | 12  | CD          | IBD     | Colonic          | A1bL2B1pG0           | Inflamed          | Severe(47.5)   | Illumina/qPCR/Ion Torrent          |
| HMC261CO  | F      | 13  | CD          | IBD     | Ileal_Colonic    | A1bL3L4abB1pG0       | Normal            | Moderate(37.5) | Illumina/qPCR                      |
| HMC262CO  | M      | 15  | CD          | IBD     | Ileal            | A1bL1L4aB1pG0        | Normal            | mild(27.5)     | Illumina                           |
| HMC265CO  | M      | 14  | Control     | Control | NA               | NA                   | Normal            | NA             | Illumina/MassSpec/qPCR/Ion Torrent |
| HMC270CO  | F      | 17  | Control     | Control | NA               | NA                   | Normal            | NA             | Illumina/qPCR/qPCR/Ion Torrent     |
| HMC272CO  | M      | 12  | CD          | IBD     | Ileal_Colonic    | A1bL3B1PG1           | Inflamed          | Severe(65)     | Illumina                           |
| HMC273CO  | M      | 15  | UC          | IBD     | LeftSidedUC      | E2S0                 | Normal            | Moderate(40)   | Illumina/qPCR/Ion Torrent          |
| HMC274CO  | M      | 17  | UC          | IBD     | Pancolitis       | E4S1                 | Inflamed          | Severe(70)     | Illumina/qPCR/Ion Torrent          |
| HMC277CO  | F      | 17  | CD          | IBD     | Ileal_Colonic    | A1bL3L4abB1G0        | Inflamed          | Moderate(32.5) | MassSpec                           |
| HMC279CO  | F      | 14  | CD          | IBD     | Colonic          | A1bL2B1G0            | Inflamed          | Severe(77.5)   | Illumina/Ion Torrent               |
| HMC280CO  | M      | 15  | CD          | IBD     | Ileal_Colonic    | A1bL3B1G0            | Inflamed          | Moderate(45)   | Illumina/MassSpec                  |
| HMC281CO  | F      | 15  | Control     | Control | NA               | NA                   | Normal            | NA             | Illumina/qPCR/MassSpec             |
| HMC283CO  | M      | 13  | Control     | Control | NA               | NA                   | Normal            | NA             | qPCR                               |
| HMC288CO  | M      | 14  | CD          | IBD     | Ileal_Colonic    | A1bL3B1pG0           | Inflamed          | Severe(67.5)   | Illumina/qPCR/Ion Torrent          |
| HMC289CO  | M      | 12  | CD          | IBD     | Ileal_Colonic    | A1bL3B1pG0           | Inflamed          | Severe(67.5)   | Illumina/qPCR                      |
| HMC295CO  | F      | 14  | CD          | IBD     | Colonic          | A1bL2B1G0            | Inflamed          | mild(25)       | Illumina/qPCR                      |
| HMC296CO  | M      | 16  | Control     | Control | NA               | NA                   | Normal            | NA             | Illumina/qPCR                      |
| HMC297CO  | F      | 17  | Control     | Control | NA               | NA                   | Normal            | NA             | Illumina/qPCR                      |
| HMC298CO* | M      | 12  | CD          | IBD     | Ileal            | A1bL1B1G0            | Normal            | Severe(62.5)   | Illumina/qPCR                      |
| HMC299CO  | M      | 11  | UC          | IBD     | Pancolitis       | E4S0                 | Inflamed          | Moderate(40)   | Illumina/qPCR                      |
| HMC301CO  | F      | 14  | CD          | IBD     | Ileal_Colonic    | A1bL3L4aB1G0         | Inflamed          | Severe(60)     | Illumina/qPCR/MassSpec             |
| HMC302CO  | F      | 17  | Control     | Control | NA               | NA                   | Normal            | NA             | Illumina/qPCR/MassSpec             |
| HMC303CO  | F      | 15  | UC          | IBD     | Pancolitis       | E4S0                 | Inflamed          | Moderate(45)   | Illumina/qPCR/Ion Torrent          |
| HMC305CO  | M      | 4   | CD          | IBD     | Ileal_Colonic    | A1aL3B1pG0           | Normal            | mild(12.5)     | qPCR                               |
| HMC307CO  | F      | 16  | Control     | Control | NA               | NA                   | Normal            | NA             | Illumina/qPCR/MassSpec             |
| HMC308CO  | M      | 10  | Control     | Control | NA               | NA                   | Normal            | NA             | qPCR                               |
| HMC309CO  | M      | 10  | Control     | Control | NA               | NA                   | Normal            | NA             | Illumina/qPCR                      |
| HMC310CO  | F      | 9   | UC          | IBD     | Pancolitis       | E4S0                 | Inflamed          | Moderate(35)   | Illumina                           |
| HMC311CO  | F      | 15  | CD          | IBD     | Ileal            | A1bL1B1pG0           | Normal            | Moderate(32.5) | Illumina/qPCR/MassSpec             |
| HMC313CO  | M      | 16  | Control     | Control | NA               | NA                   | Normal            | NA             | Illumina/qPCR/MassSpec             |

| Sample ID | Gender | Age | Description | Disease | Disease Location | Paris Classification | Visual Appearance | PCDAI /PUCAI   | Experiment             |
|-----------|--------|-----|-------------|---------|------------------|----------------------|-------------------|----------------|------------------------|
| HMC315CO  | M      | 16  | Control     | Control | NA               | NA                   | Normal            | NA             | Illumina/qPCR/MassSpec |
| HMC316CO  | M      | 14  | CD          | IBD     | Ileal_Colonic    | A1bL3L4aB1G0         | Inflammed         | mild(27.5)     | Illumina/qPCR/MassSpec |
| HMC319CO  | M      | 12  | CD          | IBD     | Ileal            | A1bL1B1G1            | Normal            | Severe(45)     | Illumina/qPCR          |
| HMC321CO  | F      | 16  | Control     | Control | NA               | NA                   | Normal            | NA             | Illumina/qPCR/MassSpec |
| HMC323CO  | F      | 16  | CD          | IBD     | Ileal_Colonic    | A1bL3B1G0            | Inflammed         | Severe(55)     | Illumina/MassSpec      |
| HMC345CO  | M      | 17  | CD          | IBD     | Ileal_Colonic    | A1bL3L4aB1G0         | Inflammed         | Severe(57.5)   | qPCR                   |
| HMC348CO  | F      | 17  | UC          | IBD     | ExtensiveUC      | E3S1                 | Normal            | Severe(85)     | qPCR                   |
| HMC350CO  | M      | 13  | Control     | Control | NA               | NA                   | Normal            | NA             | qPCR                   |
| HMC351CO  | M      | 17  | UC          | IBD     | Pancolitis       | E4S0                 | Inflammed         | Moderate(60)   | qPCR                   |
| HMC354CO  | F      | 15  | UC          | IBD     | Pancolitis       | E4S0                 | Inflammed         | mild(25)       | qPCR                   |
| HMC359CO  | M      | 11  | CD          | IBD     | Ileal            | A1bL1B1pG0           | Normal            | Moderate(37.5) | qPCR                   |
| HMC360CO  | F      | 15  | UC          | IBD     | Pancolitis       | E4S1                 | Inflammed         | Severe(65)     | qPCR                   |
| HMC361CO  | F      | 14  | UC          | IBD     | Pancolitis       | E4S1                 | Inflammed         | Severe(75)     | qPCR                   |
| HMC363CO  | M      | 14  | CD          | IBD     | Ileal            | A1bL1B1pG0           | Normal            | mild(20)       | qPCR                   |
| HMC369CO  | F      | 17  | UC          | IBD     | Pancolitis       | E4S1                 | Inflammed         | Severe(75)     | qPCR                   |
| HMC371CO  | M      | 7   | Control     | Control | NA               | NA                   | Normal            | NA             | qPCR                   |
| HMC372CO  | M      | 14  | Control     | Control | NA               | NA                   | Normal            | NA             | qPCR                   |
| HMC374CO  | M      | 15  | CD          | IBD     | Ileal_Colonic    | A1bL3B2G0            | Normal            | Moderate(37.5) | qPCR                   |
| HMC377CO  | F      | 10  | CD          | IBD     | Colonic          | A1bL2L4aB1G0         | Inflammed         | Moderate(37.5) | qPCR                   |
| HMC378CO  | F      | 8   | CD          | IBD     | Ileal_Colonic    | A1aL3L4aB1G1         | Inflammed         | Moderate(30)   | qPCR/MassSpec          |
| HMC379CO  | F      | 10  | CD          | IBD     | Ileal            | A1bL1B1pG0           | Normal            | mild(27.5)     | qPCR/MassSpec          |
| HMC381CO  | M      | 17  | Control     | Control | NA               | NA                   | Normal            | NA             | qPCR                   |
| HMC382CO  | F      | 13  | UC          | IBD     | Pancolitis       | E4S1                 | Inflammed         | Severe(65)     | qPCR                   |
| HMC390CO  | F      | 8   | CD          | IBD     | Ileal-Colonic    | A1aL3L4aB2G1         | Inflammed         | Moderate       | qPCR                   |
| HMC391CO  | M      | 15  | CD          | IBD     | Ileal            | A1bL1B1pG1           | Normal            | Inactive(5)    | qPCR                   |
| HMC392CO  | M      | 15  | CD          | IBD     | Ileal_Colonic    | A1bL3B1pG0           | Normal            | Inactive(0)    | qPCR                   |
| HMC394CO  | M      | 16  | CD          | IBD     | Ileal_Colonic    | A1bL3B1G0            | Inflammed         | Moderate(32.5) | qPCR                   |
| HMC396CO  | M      | 17  | CD          | IBD     | Ileal_Colonic    | A1bL3B1G1            | Inflammed         | Inactive(2.5)  | qPCR                   |
| HMC397CO  | F      | 10  | Control     | Control | NA               | NA                   | Normal            | NA             | qPCR                   |
| HMC398CO  | F      | 12  | UC          | IBD     | Pancolitis       | E4S1                 | Inflammed         | Severe(70)     | qPCR                   |
| HMC399CO  | F      | 14  | CD          | IBD     | Colonic          | A1bL2B1G0            | Inflammed         | mild(17.5)     | qPCR                   |

| Sample ID | Gender | Age | Description | Disease | Disease Location | Paris Classification | Visual Appearance | PCDAI /PUCAI   | Experiment |
|-----------|--------|-----|-------------|---------|------------------|----------------------|-------------------|----------------|------------|
| HMC400CO  | M      | 13  | UC          | IBD     | LeftSidedUC      | E2S0                 | Normal            | Moderate(60)   | qPCR       |
| HMC401CO  | M      | 12  | CD          | IBD     | Ileal            | A1bL1B2G0            | Normal            | mild(10)       | qPCR       |
| HMC402CO  | F      | 7   | UC          | IBD     | Pancolitis       | E4S0                 | Inflammed         | Moderate(60)   | qPCR       |
| HMC403CO  | F      | 16  | Control     | Control | NA               | NA                   | Normal            | NA             | qPCR       |
| HMC405CO  | M      | 15  | UC          | IBD     | Pancolitis       | E4S0                 | Inflammed         | Moderate(55)   | qPCR       |
| HMC406CO  | F      | 4   | CD          | IBD     | Colonic          | A1aL2L4aB1G0         | Inflammed         | Moderate(37.5) | MassSpec   |
| HMC407CO  | M      | 15  | CD          | IBD     | Ileal_Colonic    | A1bL3L4aB1pGO        | Normal            | Moderate(32.5) | MassSpec   |
| HMC418CO  | M      | 10  | CD          | IBD     | Ileal            | A1aL1L4aB1G0         | Normal            | mild(12.5)     | MassSpec   |
| HMC449CO  | M      | 16  | CD          | IBD     | Ileal_Colonic    | A1bL3B1G1            | Inflammed         | mild(17.5)     | MassSpec   |
| HMC460CO  | M      | 17  | CD          | IBD     | Ileal_Colonic    | A1bL3B1G0            | Inflammed         | mild(22.5)     | MassSpec   |
| HMC465CO  | M      | 11  | CD          | IBD     | Ileal_Colonic    | A1bL4aL3B1G1         | Inflammed         | Moderate(35)   | MassSpec   |

CD = Crohn's disease; M= Male; F= Female; UC = Ulcerative Colitis; Illumina = Hiseq2500 sequencing; 454pyro = pyrosequencing Roche 454 GS-FLX; PUCAI = Pediatric Ulcerative Colitis Activity Index and PCDAI = Pediatric Crohn's Disease Activity Index.

\*Patient HMC203 received three days of metronidazole treatment prior to colonoscopy and patient HM298 received four days of mesalazine treatment followed by six days of no treatment prior to colonoscopy

**Supplementary Table 2: Primers used for constructing the 16S rRNA-V6 Illumina library.**  
Nucleotides in bold represent the barcode sequences.

| Primer Name | Primer Sequence (5' – 3')                                              |
|-------------|------------------------------------------------------------------------|
| MF1         | ACACTCTTCCCTACACGACGCTCTCCGATCT <b>ATAGCG</b> AAACTCAAAGGAATTGACGG     |
| MF2         | ACACTCTTCCCTACACGACGCTCTCCGATCT <b>AGGGT</b> AAACTCAAAGGAATTGACGG      |
| MF3         | ACACTCTTCCCTACACGACGCTCTCCGATCT <b>TTTCATA</b> AAACTCAAAGGAATTGACGG    |
| MF4         | ACACTCTTCCCTACACGACGCTCTCCGATCT <b>GATCGT</b> AAACTCAAAGGAATTGACGG     |
| MF5         | ACACTCTTCCCTACACGACGCTCTCCGATCT <b>GCCCGT</b> AAACTCAAAGGAATTGACGG     |
| MF6         | ACACTCTTCCCTACACGACGCTCTCCGATCT <b>CTGTCA</b> AAACTCAAAGGAATTGACGG     |
| MF7         | ACACTCTTCCCTACACGACGCTCTCCGATCT <b>CACGT</b> AAACTCAAAGGAATTGACGG      |
| MF8         | ACACTCTTCCCTACACGACGCTCTCCGATCT <b>CGTACG</b> AAACTCAAAGGAATTGACGG     |
| MF9         | ACACTCTTCCCTACACGACGCTCTCCGATCT <b>GGACA</b> AAACTCAAAGGAATTGACGG      |
| MF10        | ACACTCTTCCCTACACGACGCTCTCCGATCT <b>TAGAAA</b> AAACTCAAAGGAATTGACGG     |
| MF11        | ACACTCTTCCCTACACGACGCTCTCCGATCT <b>TCATA</b> AAACTCAAAGGAATTGACGG      |
| MF12        | ACACTCTTCCCTACACGACGCTCTCCGATCT <b>ACTTAA</b> AAACTCAAAGGAATTGACGG     |
| MR1         | CTCGGCATTCCCTGCTGAACCGCTCTCCGATCT <b>ATAGCG</b> AACGAGCTGACGACARCCATG  |
| MR2         | CTCGGCATTCCCTGCTGAACCGCTCTCCGATCT <b>AGGGT</b> AACGAGCTGACGACARCCATG   |
| MR3         | CTCGGCATTCCCTGCTGAACCGCTCTCCGATCT <b>TTTCATA</b> AACGAGCTGACGACARCCATG |
| MR4         | CTCGGCATTCCCTGCTGAACCGCTCTCCGATCT <b>GATCGT</b> AACGAGCTGACGACARCCATG  |
| MR5         | CTCGGCATTCCCTGCTGAACCGCTCTCCGATCT <b>GCCCGT</b> AACGAGCTGACGACARCCATG  |
| MR6         | CTCGGCATTCCCTGCTGAACCGCTCTCCGATCT <b>CTGTCA</b> AACGAGCTGACGACARCCATG  |
| MR7         | CTCGGCATTCCCTGCTGAACCGCTCTCCGATCT <b>CACGT</b> AACGAGCTGACGACARCCATG   |
| MR8         | CTCGGCATTCCCTGCTGAACCGCTCTCCGATCT <b>CGTACG</b> AACGAGCTGACGACARCCATG  |
| MR9         | CTCGGCATTCCCTGCTGAACCGCTCTCCGATCT <b>GGACA</b> AACGAGCTGACGACARCCATG   |
| MR10        | CTCGGCATTCCCTGCTGAACCGCTCTCCGATCT <b>TAGAAA</b> AACGAGCTGACGACARCCATG  |
| MR11        | CTCGGCATTCCCTGCTGAACCGCTCTCCGATCT <b>TCATA</b> ACGAGCTGACGACARCCATG    |
| MR12        | CTCGGCATTCCCTGCTGAACCGCTCTCCGATCT <b>ACTTAC</b> GAGCTGACGACARCCATG     |
| PCR-FWD1    | AATGATACGGCGACCACCGAGATCTACACTCTTCCCTACACGACGCTCTCCGATCT               |
| PCR-RVS1    | CAAGCAGAAGACGCCATACGAGATCGGTCTCGGCATTCCCTGCTGAACCGCTCTCCGATCT          |



**Supplementary Table 3: Primers used for constructing the 16S rRNA-V4/V6 Ion Torrent libraries**

| Primer Name | 16S Target Region | Barcode     | Primer Sequence (5' – 3')                                      |
|-------------|-------------------|-------------|----------------------------------------------------------------|
| v6_BC001    | V6                | TCTTAACCGGC | CCATCTCATCCCTGCGTGTCTCCGACTCAGTCTTAACCGGCAAACCTCAAAGAATTGACGG  |
| v4_BC001    | V4                | TCTTAACCGGC | CCATCTCATCCCTGCGTGTCTCCGACTCAGTCTTAACCGGCAYTGGGYDTAAAGNG       |
| v6_BC002    | V6                | TTAGGTACGGC | CCATCTCATCCCTGCGTGTCTCCGACTCAGTTAGGTACGGCAAACCTCAAAGAATTGACGG  |
| v4_BC002    | V4                | TTAGGTACGGC | CCATCTCATCCCTGCGTGTCTCCGACTCAGTTAGGTACGGCAYTGGGYDTAAAGNG       |
| v6_BC003    | V6                | TTCGTAACCGC | CCATCTCATCCCTGCGTGTCTCCGACTCAGTTTCGTAACCGCAAACCTCAAAGAATTGACGG |
| v4_BC003    | V4                | TTCGTAACCGC | CCATCTCATCCCTGCGTGTCTCCGACTCAGTTTCGTAACCGCAYTGGGYDTAAAGNG      |
| v6_BC004    | V6                | TTCCGTAAGCC | CCATCTCATCCCTGCGTGTCTCCGACTCAGTTCCGTAAGCCAAACCTCAAAGAATTGACGG  |
| v4_BC004    | V4                | TTCCGTAAGCC | CCATCTCATCCCTGCGTGTCTCCGACTCAGTTCCGTAAGCCAYTGGGYDTAAAGNG       |
| v6_BC005    | V6                | TTACGGACGAC | CCATCTCATCCCTGCGTGTCTCCGACTCAGTTACGGACGACAAACCTCAAAGAATTGACGG  |
| v4_BC005    | V4                | TTACGGACGAC | CCATCTCATCCCTGCGTGTCTCCGACTCAGTTACGGACGACAYTGGGYDTAAAGNG       |
| v6_BC006    | V6                | TACTAACCGCC | CCATCTCATCCCTGCGTGTCTCCGACTCAGTACTAACCGCCAAACCTCAAAGAATTGACGG  |
| v4_BC006    | V4                | TACTAACCGCC | CCATCTCATCCCTGCGTGTCTCCGACTCAGTACTAACCGCCAYTGGGYDTAAAGNG       |
| v6_BC008    | V6                | TTAACCGCACC | CCATCTCATCCCTGCGTGTCTCCGACTCAGTTAACCGCACCAAACCTCAAAGAATTGACGG  |
| v4_BC008    | V4                | TTAACCGCACC | CCATCTCATCCCTGCGTGTCTCCGACTCAGTTAACCGCACCAAYTGGGYDTAAAGNG      |
| v6_BC009    | V6                | TTAACGACGCC | CCATCTCATCCCTGCGTGTCTCCGACTCAGTTAACGACGCCAAACCTCAAAGAATTGACGG  |
| v4_BC009    | V4                | TTAACGACGCC | CCATCTCATCCCTGCGTGTCTCCGACTCAGTTAACGACGCCAYTGGGYDTAAAGNG       |
| v6_BC010    | V6                | TTAACCGTGGC | CCATCTCATCCCTGCGTGTCTCCGACTCAGTTAACCGTGCCAAACCTCAAAGAATTGACGG  |
| v4_BC010    | V4                | TTAACCGTGGC | CCATCTCATCCCTGCGTGTCTCCGACTCAGTTAACCGTGCCAYTGGGYDTAAAGNG       |
| v6_BC011    | V6                | TATTACCGGCC | CCATCTCATCCCTGCGTGTCTCCGACTCAGTATTACCGGCCAAACCTCAAAGAATTGACGG  |
| v4_BC011    | V4                | TATTACCGGCC | CCATCTCATCCCTGCGTGTCTCCGACTCAGTATTACCGGCCAYTGGGYDTAAAGNG       |
| v6_BC012    | V6                | TAACGGCCTTC | CCATCTCATCCCTGCGTGTCTCCGACTCAGTAACGGCCTTCAAACCTCAAAGAATTGACGG  |
| v4_BC012    | V4                | TAACGGCCTTC | CCATCTCATCCCTGCGTGTCTCCGACTCAGTAACGGCCTTCAYTGGGYDTAAAGNG       |
| v6_BC013    | V6                | TCCTAACGTCC | CCATCTCATCCCTGCGTGTCTCCGACTCAGTCCTAACGTCCAAACCTCAAAGAATTGACGG  |
| v4_BC013    | V4                | TCCTAACGTCC | CCATCTCATCCCTGCGTGTCTCCGACTCAGTCCTAACGTCCAYTGGGYDTAAAGNG       |
| v6_BC014    | V6                | AATACCGGACC | CCATCTCATCCCTGCGTGTCTCCGACTCAGAATACCGGACCAAACCTCAAAGAATTGACGG  |
| v4_BC014    | V4                | AATACCGGACC | CCATCTCATCCCTGCGTGTCTCCGACTCAGAATACCGGACCAAYTGGGYDTAAAGNG      |
| v6_BC015    | V6                | TTACCTTCCGC | CCATCTCATCCCTGCGTGTCTCCGACTCAGTTACCTTCCGCAAACCTCAAAGAATTGACGG  |
| v4_BC015    | V4                | TTACCTTCCGC | CCATCTCATCCCTGCGTGTCTCCGACTCAGTTACCTTCCGCAYTGGGYDTAAAGNG       |
| v6_BC016    | V6                | TACTACGGTCC | CCATCTCATCCCTGCGTGTCTCCGACTCAGTACTACGGTCCAAACCTCAAAGAATTGACGG  |
| v4_BC016    | V4                | TACTACGGTCC | CCATCTCATCCCTGCGTGTCTCCGACTCAGTACTACGGTCCAYTGGGYDTAAAGNG       |
| v6_BC017    | V6                | TAACCGACTCC | CCATCTCATCCCTGCGTGTCTCCGACTCAGTAACCGACTCCAAACCTCAAAGAATTGACGG  |
| v4_BC017    | V4                | TAACCGACTCC | CCATCTCATCCCTGCGTGTCTCCGACTCAGTAACCGACTCCAYTGGGYDTAAAGNG       |
| v6_BC018    | V6                | TTCCGGTATCC | CCATCTCATCCCTGCGTGTCTCCGACTCAGTTCCGGTATCCAAACCTCAAAGAATTGACGG  |
| v4_BC018    | V4                | TTCCGGTATCC | CCATCTCATCCCTGCGTGTCTCCGACTCAGTTCCGGTATCCAYTGGGYDTAAAGNG       |
| v6_BC019    | V6                | TTAACACCGGC | CCATCTCATCCCTGCGTGTCTCCGACTCAGTTAACACCGGCAAACCTCAAAGAATTGACGG  |
| v4_BC019    | V4                | TTAACACCGGC | CCATCTCATCCCTGCGTGTCTCCGACTCAGTTAACACCGGCAYTGGGYDTAAAGNG       |
| v6_BC020    | V6                | TTAATCCGGCC | CCATCTCATCCCTGCGTGTCTCCGACTCAGTTAATCCGGCCAAACCTCAAAGAATTGACGG  |
| v4_BC020    | V4                | TTAATCCGGCC | CCATCTCATCCCTGCGTGTCTCCGACTCAGTTAATCCGGCCAYTGGGYDTAAAGNG       |

| Primer Name | 16S Target Region | Barcode      | Primer Sequence (5' – 3')                                     |
|-------------|-------------------|--------------|---------------------------------------------------------------|
| v6_BC023    | V6                | AACCTCGGTTG  | CCATCTCATCCCTGCGTGTCTCCGACTCAGAACCTCGGTTGAAACTCAAAGAATTGACGG  |
| v4_BC023    | V4                | AACCTCGGTTG  | CCATCTCATCCCTGCGTGTCTCCGACTCAGAACCTCGGTTGAYTGGGYDTAAAGNG      |
| v6_BC024    | V6                | TCTCCGTTAGG  | CCATCTCATCCCTGCGTGTCTCCGACTCAGTCTCCGTTAGGAAACTCAAAGAATTGACGG  |
| v4_BC024    | V4                | TCTCCGTTAGG  | CCATCTCATCCCTGCGTGTCTCCGACTCAGTCTCCGTTAGGAYTGGGYDTAAAGNG      |
| v6_BC025    | V6                | TTATTCCGCCG  | CCATCTCATCCCTGCGTGTCTCCGACTCAGTTATTCCGCCGAAACTCAAAGAATTGACGG  |
| v4_BC025    | V4                | TTATTCCGCCG  | CCATCTCATCCCTGCGTGTCTCCGACTCAGTTATTCCGCCGAYTGGGYDTAAAGNG      |
| v6_BC026    | V6                | TTAAGGTGCCG  | CCATCTCATCCCTGCGTGTCTCCGACTCAGTTAAGGTGCCGAAACTCAAAGAATTGACGG  |
| v4_BC026    | V4                | TTAAGGTGCCG  | CCATCTCATCCCTGCGTGTCTCCGACTCAGTTAAGGTGCCGAYTGGGYDTAAAGNG      |
| v6_BC027    | V6                | TAATTGGCCGG  | CCATCTCATCCCTGCGTGTCTCCGACTCAGTAATTGGCCGAAACTCAAAGAATTGACGG   |
| v4_BC027    | V4                | TAATTGGCCGG  | CCATCTCATCCCTGCGTGTCTCCGACTCAGTAATTGGCCGAYTGGGYDTAAAGNG       |
| v6_BC028    | V6                | TTCTCTACCGG  | CCATCTCATCCCTGCGTGTCTCCGACTCAGTTCTCTACCGGAAACTCAAAGAATTGACGG  |
| v4_BC028    | V4                | TTCTCTACCGG  | CCATCTCATCCCTGCGTGTCTCCGACTCAGTTCTCTACCGGAYTGGGYDTAAAGNG      |
| v6_BC029    | V6                | TTACCGAAGCG  | CCATCTCATCCCTGCGTGTCTCCGACTCAGTTACCGAAGCGAAACTCAAAGAATTGACGG  |
| v4_BC029    | V4                | TTACCGAAGCG  | CCATCTCATCCCTGCGTGTCTCCGACTCAGTTACCGAAGCGAYTGGGYDTAAAGNG      |
| v6_BC030    | V6                | TTAACCAGCCG  | CCATCTCATCCCTGCGTGTCTCCGACTCAGTTAACCAGCCGAAACTCAAAGAATTGACGG  |
| v4_BC030    | V4                | TTAACCAGCCG  | CCATCTCATCCCTGCGTGTCTCCGACTCAGTTAACCAGCCGAYTGGGYDTAAAGNG      |
| v6_BC031    | V6                | TTAGGACTCCG  | CCATCTCATCCCTGCGTGTCTCCGACTCAGTTAGGACTCCGAAACTCAAAGAATTGACGG  |
| v4_BC031    | V4                | TTAGGACTCCG  | CCATCTCATCCCTGCGTGTCTCCGACTCAGTTAGGACTCCGAYTGGGYDTAAAGNG      |
| v6_BC032    | V6                | TATTCCGGTTCG | CCATCTCATCCCTGCGTGTCTCCGACTCAGTATTCCGGTTCGAAACTCAAAGAATTGACGG |
| v4_BC032    | V4                | TATTCCGGTTCG | CCATCTCATCCCTGCGTGTCTCCGACTCAGTATTCCGGTTCGAYTGGGYDTAAAGNG     |
| v6_BC033    | V6                | TTAACGCCAGG  | CCATCTCATCCCTGCGTGTCTCCGACTCAGTTAACGCCAGGAAACTCAAAGAATTGACGG  |
| v4_BC033    | V4                | TTAACGCCAGG  | CCATCTCATCCCTGCGTGTCTCCGACTCAGTTAACGCCAGGAYTGGGYDTAAAGNG      |
| v6_BC034    | V6                | TCGTCCTTAGG  | CCATCTCATCCCTGCGTGTCTCCGACTCAGTCGTCCTTAGGAAACTCAAAGAATTGACGG  |
| v4_BC034    | V4                | TCGTCCTTAGG  | CCATCTCATCCCTGCGTGTCTCCGACTCAGTCGTCCTTAGGAYTGGGYDTAAAGNG      |
| v6_BC035    | V6                | TTAAGACGGCG  | CCATCTCATCCCTGCGTGTCTCCGACTCAGTTAAGACGGCGAAACTCAAAGAATTGACGG  |
| v4_BC035    | V4                | TTAAGACGGCG  | CCATCTCATCCCTGCGTGTCTCCGACTCAGTTAAGACGGCGAYTGGGYDTAAAGNG      |
| v6_BC036    | V6                | TTACTCGACCG  | CCATCTCATCCCTGCGTGTCTCCGACTCAGTTACTCGACCGAAACTCAAAGAATTGACGG  |
| v4_BC036    | V4                | TTACTCGACCG  | CCATCTCATCCCTGCGTGTCTCCGACTCAGTTACTCGACCGAYTGGGYDTAAAGNG      |
| v6_BC037    | V6                | TTACACCTCCG  | CCATCTCATCCCTGCGTGTCTCCGACTCAGTTACACCTCCGAAACTCAAAGAATTGACGG  |
| v4_BC037    | V4                | TTACACCTCCG  | CCATCTCATCCCTGCGTGTCTCCGACTCAGTTACACCTCCGAYTGGGYDTAAAGNG      |
| v6_BC038    | V6                | TAACCTCCGAG  | CCATCTCATCCCTGCGTGTCTCCGACTCAGTAACCTCCGAGAAACTCAAAGAATTGACGG  |
| v4_BC038    | V4                | TAACCTCCGAG  | CCATCTCATCCCTGCGTGTCTCCGACTCAGTAACCTCCGAGAYTGGGYDTAAAGNG      |
| v6_BC039    | V6                | TTAAGCGTCCG  | CCATCTCATCCCTGCGTGTCTCCGACTCAGTTAAGCGTCCGAAACTCAAAGAATTGACGG  |
| v4_BC039    | V4                | TTAAGCGTCCG  | CCATCTCATCCCTGCGTGTCTCCGACTCAGTTAAGCGTCCGAYTGGGYDTAAAGNG      |
| v4_reverse  | V6                | none         | CCTCTCTATGGGCAGTCGGTGATTACNVGGGTATCTAATCC                     |
| v6_reverse  | V4                | none         | CCTCTCTATGGGCAGTCGGTGATACGAGCTGACGACARCCATG                   |

**Supplementary Table 4: Primers used in qPCR validation of V6-16S sequencing results and BCoAT/DSR levels.**

| Gene                                        | Primer ID  | Sequence                              | Reference                                  |
|---------------------------------------------|------------|---------------------------------------|--------------------------------------------|
| 16S rRNA                                    | UniF       | 5'-GTGSTGCAYGGYYGTCGTCA-3'            | (Fuller <i>et al.</i> , 2007) <sup>1</sup> |
|                                             | UniR       | 5'-ACGTCRTCCMCNCCTTCCTC-3'            |                                            |
| Butyryl-CoA: acetyl-CoA transferase (BCoAT) | BCoATscrF  | 5'-GCIGAICATTTACITGGAAYSITGGCAYATG-3' | (Louis and Flint, 2007) <sup>2</sup>       |
|                                             | BCoATscrR  | 5'-CCTGCCTTTGCAATRTCACRAANGC-3'       |                                            |
| 16S rRNA                                    | 16SUNIV-F  | 5'-GGTGAATACGTTCCCGG-3'               | (Kostic <i>et al.</i> , 2013) <sup>3</sup> |
|                                             | 16SUNIV-R  | 5'-TACGGCTACCTTGTACGACTT-3'           |                                            |
| 16S rRNA                                    | Aparv-711F | 5'- GGGGAGTATTTCTTCCGTGCCG -3'        | This Study                                 |
|                                             | Aparv-881R | 5'- CTTACCTAAATGTCAAGCCCTGG -3'       |                                            |
| Dissimilatory Sulfite Reductase (DSR)       | DSR1-F     | 5'-ACSCACTGGAAGCACGGCGG-3'            | (Bourne <i>et al.</i> , 2011) <sup>4</sup> |
|                                             | DSR1-R     | 5'-GTGGMRCCTGTCAKRTTGG-3'             |                                            |

**Supplementary Table 5: Primers used in qRT-PCR.**

| <b>Gene</b>           | <b>Primer name</b> | <b>Sequence</b>                 | <b>Reference</b>                  |
|-----------------------|--------------------|---------------------------------|-----------------------------------|
| <b><i>hGAPDH</i></b>  | hGAPDHF            | 5'-AGAAGGCTGGGGCTCATTTG-3'      | (Zhang et al., 2012) <sup>5</sup> |
|                       | hGAPDHR            | 5'-AGGGGCCATCCACAGTCTTC-3'      |                                   |
| <b><i>TST</i></b>     | hTSTF              | 5'-TCTCAAGGGCGGTTCTG-3'         | This study                        |
|                       | hTSTR              | 5'-CGTACACGGCCACATCAGGC-3'      |                                   |
| <b><i>SQRDL</i></b>   | SQRDL951F          | 5'-AATGCCATCTTCACCTTCCC-3'      | This study                        |
|                       | SQRDL1105R         | 5'-TTAACCCCGAAAATGGCTCC-3'      |                                   |
| <b><i>COX4-1</i></b>  | hCOX497F           | 5'-GTGGGCGGTGCCATGTTCTT-3'      | This study                        |
|                       | hCOX757R           | 5'-GCATGGAGTTGCATGGCGGT-3'      |                                   |
| <b><i>β-actin</i></b> | β-actinF           | 5'-TGGAATCCTGTGGCATCCATGAAAC-3' | This study                        |
|                       | β-actinR           | 5'-TAAAACGCAGCTCAGTAACAGTCCG-3' |                                   |
| <b><i>cxcl1</i></b>   | cxcl1F             | 5'-GCTGGGATTCACCTCAAGAA-3'      | This study                        |
|                       | cxcl1R             | 5'-TCTCCGTTACTTGGGGACAC-3'      |                                   |
| <b><i>tnf</i></b>     | tnfF               | 5'-ATGAGCACAGAAAGCATGATC-3'     | This study                        |
|                       | tnfR               | 5'-TACAGGCTTGTCACTCGAATT-3'     |                                   |
| <b><i>il12p40</i></b> | il12p40F           | 5'-GGAAGCACGGCAGCAGCAGAATA-3'   | This study                        |
|                       | il12p40R           | 5'-AACTTGAGGGAGAAGTAGGAATGG-3'  |                                   |
| <b><i>il-1β</i></b>   | il1bF              | 5'-GCCCATCCTCTGTGACTCAT-3'      | This study                        |
|                       | il1bR              | 5'-AGGCCACAGGTATTTGTCCG-3'      |                                   |
| <b><i>il-17a</i></b>  | il17aF             | 5'-TCCAGAAGGCCCTCAGACTA-3'      | This study                        |
|                       | il17aR             | 5'-ACACCCACCAGCATCTTCTC-3'      |                                   |

## Supplementary Information References

1. Fuller, Z., *et al.* Influence of cabbage processing methods and prebiotic manipulation of colonic microflora on glucosinolate breakdown in man. *The British journal of nutrition* **98**, 364-372 (2007).
2. Louis, P. & Flint, H.J. Development of a semiquantitative degenerate real-time pcr-based assay for estimation of numbers of butyryl-coenzyme A (CoA) CoA transferase genes in complex bacterial samples. *Appl Environ Microbiol* **73**, 2009-2012 (2007).
3. Kostic, A.D., *et al.* *Fusobacterium nucleatum* potentiates intestinal tumorigenesis and modulates the tumor-immune microenvironment. *Cell Host Microbe* **14**, 207-215 (2013).
4. Bourne, D.G., Muirhead, A. & Sato, Y. Changes in sulfate-reducing bacterial populations during the onset of black band disease. *ISME J* **5**, 559-564 (2011).
5. Zhang, P.J., *et al.* Genes expression profiling of peripheral blood cells of patients with hepatocellular carcinoma. *Cell biology international* **36**, 803-809 (2012).
